# Supplementary material for: Photoredox catalytic organic reactions promoted with broadband visible light-absorbing Bodipy-iodo-aza-Bodipy triad photocatalyst
Source: Royal Society of Chemistry journal article supplement (doi:10.1039/c4ra03631j), 2014-01-01
Supplement: c4ra03631j1.pdf [file c4ra03631j1.pdf]

## Electronic Supplementary Information for:

# Photoredox catalytic organic reactions promoted with broadband visible light-absorbing Bodipy-iodo azaBodipy triad photocatalyst

Song Guo, Renjie Tao and Jianzhang Zhao\*

State Key Laboratory of Fine Chemicals, School of Chemical Engineering, Dalian University of Technology, E-208  
Western Campus, 2 Ling Gong Road, Dalian 116024, P. R. China.

E-mail: zhaojzh@dlut.edu.cn Web: <http://finechem.dlut.edu.cn/photochem>

## Index

|                                                                                   |     |
|-----------------------------------------------------------------------------------|-----|
| 1. Experimental Section.....                                                      | S2  |
| 2. NMR and HRMS spectra.....                                                      | S14 |
| 3. Photophysical and photochemistry of <b>B-1</b> and <b>B-2</b> .....            | S39 |
| 4. Mechanism of the photocatalytic reaction.....                                  | S40 |
| 5. Spectrum of the Xenon lamp and the UV-Vis absorption spectrum.....             | S42 |
| 6. Comparison of the yield of <b>B-1</b> and <b>B-2</b> .....                     | S43 |
| 7. The Photocatalytic reaction with sun light excitation.....                     | S43 |
| 8. Diiodo-Bodipy as photocatalysts for aerobic oxidation [3+2] cycloaddition..... | S44 |
| 9. <b>B-2</b> as photocatalysts for a reproducing work.....                       | S44 |
| 10. The Photocatalytic reaction run on a large scale.....                         | S47 |
| 11. The detailed data of electrochemistry.....                                    | S48 |

## 1. Experimental Section

### General Information:

Fluorescence spectra were recorded on a Shimadzu RF 5301PC spectrofluorometer. UV-Vis absorption spectra were taken on a HP8453 UV-visible spectrophotometer. The nanosecond time-resolved transient difference absorption spectra were detected by Edinburgh LP920 instruments (Edinburgh Instruments, UK). The signal was buffered on a Tektronix TDS 3012B oscilloscope and was analyzed by the LP900 software. All samples in flash photolysis experiments were deaerated with  $N_2$  for ca. 15 min before measurement.

Electron spin resonance (ESR) spectroscopy. ESR spectra were recorded at room temperature using a Bruker ESP-300E spectrometer at 9.8 GHz, X-band, with 100 Hz field modulation. Samples were quantitatively injected into specially made quartz capillaries for ESR analysis in the dark and illuminated directly in the cavity of the ESR spectrometer. Triplet photosensitizers and superoxide radical anion ( $O_2^{\bullet-}$ ) or singlet oxygen ( $^1O_2$ ) scavengers (5,5-dimethyl-1-pyrroline-N-oxide (DMPO) or 2,2,6,6-tetramethylpiperidine (TEMP)) in air-saturated  $CH_3CN$  was stirred in the dark, then the solution was injected into the quartz capillaries. A diode pumped solid state (DPSS) laser (532 nm) irradiate the solution in quartz capillaries 120 seconds.

**1.0** For the synthesis of **B-1-B-3**, please refer to *Chem. Sci.*, 2014, **5**, 489 –500.

**2.0** The detail of oxidation/ [3+2] cycloaddition/ aromatization reaction

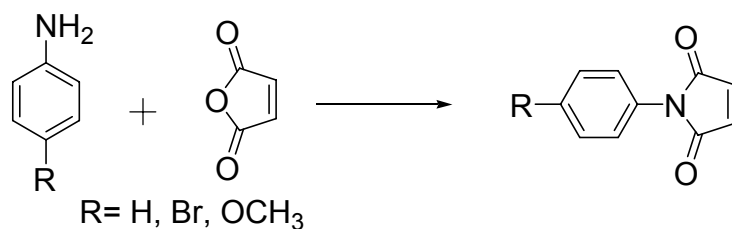

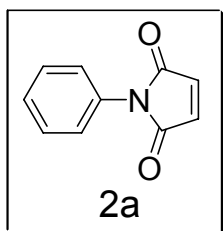

### Synthesis of **2a**

General methods: Phenylamine (0.39g, 4.2 mmol) were dissolved in THF (15 mL). Maleic anhydride (0.49g, 5 mmol) was dissolved in another portion of THF (15 mL). Maleic anhydride solution was dropped into the aniline derivatives slowly, the reaction mixture was stirred for 30 min at room temperature. A lot of precipitation appeared. The precipitation was collected by filtration. The filtrate was dissolved in acetic anhydride (10 mL) and acetic acid-sodium (6 mmol) was added. The mixture was heated at 120°C by microwave irradiation for 30 min. The acetic anhydride solution was poured into water (20 mL), saturated NaOH solution was added to neutralize the mixture. Precipitation appeared and the solid was collected by filtration. The precipitates was purified by column chromatography (silica gel, CH<sub>2</sub>Cl<sub>2</sub>/petroleum ether = 1/1, v/v). Yield: 0.6 g (82.6%). M.p. 82.9–83.2°C. <sup>1</sup>H NMR (400 MHz, CDCl<sub>3</sub>)  $\delta$  = 7.47 (t, *J* = 7.2 Hz, 2H), 7.37–7.34 (m, 3H), 6.84 (s, 2H). HRMS (ESI<sup>+</sup>): Calcd C<sub>10</sub>H<sub>7</sub>NO<sub>2</sub> [M+H]<sup>+</sup> *m/z* = 173.0477. Found *m/z* = 173.0787.

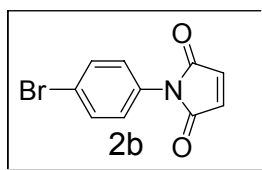

### Synthesis of **2b**

4-bromobenzenamine (0.27g, 1.55 mmol) were dissolved in THF (12 mL). Maleic anhydride (0.2g, 2 mmol) was dissolved in another portion of THF (12 mL). Maleic anhydride solution was dropped into the aniline derivatives slowly, the reaction mixture was stirred for 30 min at room temperature. A lot of precipitation appeared. The precipitation was collected by filtration. The filtrate was dissolved in acetic anhydride (5 mL) and acetic acid-sodium (3 mmol) was added. The mixture was heated at 120°C by microwave irradiation for 30 min. The acetic anhydride solution was poured into water (15 mL), saturated NaOH solution was added to neutralize the mixture. Precipitation appeared and the

solid was collected by filtration. The precipitates was purified by column chromatography (silica gel, CH<sub>2</sub>Cl<sub>2</sub>/petroleum ether = 1/1, v/v), Yield: 0.3 g (76.8%). M.p. 121.4–121.8 °C. <sup>1</sup>H NMR (400 MHz, CDCl<sub>3</sub>) δ = 7.63 (d, *J* = 9.2 Hz, 2H), 7.27–7.22 (m, 2H), 6.86 (s, 2H). HRMS (ESI<sup>+</sup>): Calcd C<sub>10</sub>H<sub>6</sub>NO<sub>2</sub>Br [M+H]<sup>+</sup> *m/z* = 251.9766. Found *m/z* = 251.9739.

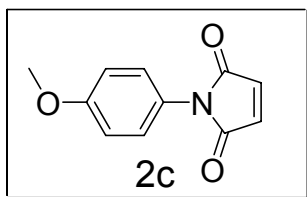

### Synthesis of **2c**

4-methoxybenzenamine (0.15g, 1.27 mmol) were dissolved in THF (10 mL). Maleic anhydride (0.2g, 2 mmol) was dissolved in another portion of THF (10 mL). Maleic anhydride solution was dropped into the aniline derivatives slowly, the reaction mixture was stirred for 30 min at room temperature. A lot of precipitation appeared. The precipitation was collected by filtration. The filtrate was dissolved in acetic anhydride (5 mL) and acetic acid-sodium (3 mmol) was added. The mixture was heated at 120°C by microwave irradiation for 30 min. The acetic anhydride solution was poured into water (15 mL), saturated NaOH solution was added to neutralize the mixture. Precipitation appeared and the solid was collected by filtration. The precipitates was purified by column chromatography (silica gel, CH<sub>2</sub>Cl<sub>2</sub>/petroleum ether = 1/1, v/v), Yield: 0.2 g (77.2%). M.p. 147.7–148.2°C. <sup>1</sup>H NMR (400 MHz, CDCl<sub>3</sub>) δ = 7.23 (d, *J* = 4.8 Hz, 2H), 7.00 (d, *J* = 2.0 Hz, 2H), 6.84 (s, 2H), 3.83 (s, 3H). HRMS (ESI<sup>+</sup>): Calcd C<sub>11</sub>H<sub>9</sub>NO<sub>2</sub>Na [M+Na]<sup>+</sup> *m/z* = 226.0467. Found *m/z* = 226.0469.

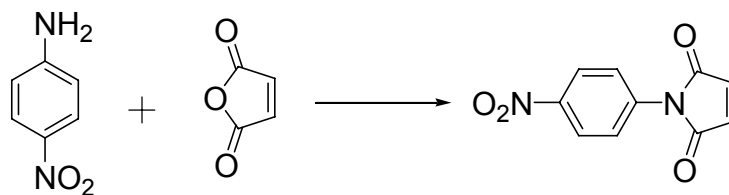

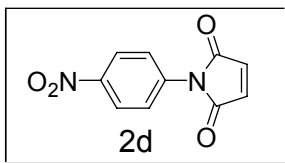

### Synthesis of **2d**

*p*-nitroaniline (10 mmol) and maleic anhydride (11 mmol) was dissolved in THF (40 mL). The mixture was stirred under reflux for 6 h. Precipitation appeared and the solid was filtrated. The filtrate was dissolved in acetic anhydride (20 mL), then sodium acetate (12 mmol) was added. The mixture was heated by microwave irradiation at 120°C for 30 min. The acetic anhydride solution was poured into water (20 mL), saturated NaOH solution was added to neutralize the solution. The precipitation was collected by filtration and purified by column chromatography (silica gel, CH<sub>2</sub>Cl<sub>2</sub>/petroleum 1/1, v/v), Yield: 0.3 g (62.1%). M.p. 170.1–170.7°C. <sup>1</sup>H NMR (400 MHz, CDCl<sub>3</sub>) δ = 8.36 (d, *J* = 9.2 Hz, 2H), 7.68 (d, *J* = 6.0 Hz, 2H), 6.94 (s, 2H). HRMS (ESI<sup>+</sup>): Calcd C<sub>10</sub>H<sub>5</sub>N<sub>2</sub>O<sub>4</sub> [M-H]<sup>-</sup> *m/z* = 217.0328. Found *m/z* = 217.0660.

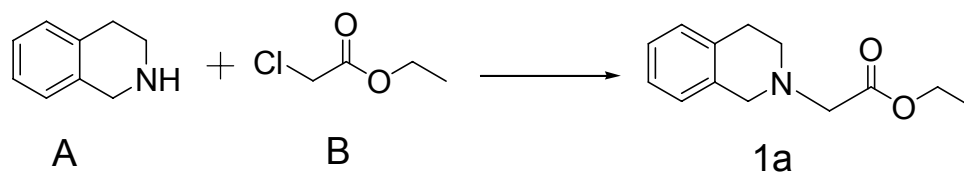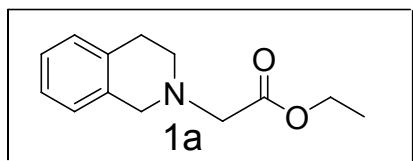

### Synthesis of **1a**

**A** (0.41g, 3.1 mmol), **B** (0.42g, 3.5 mmol) and Na<sub>2</sub>CO<sub>3</sub> (10 mmol) was dissolved in THF (30 mL), the mixture was stirred at room temperature for 24 h. When the reaction was completed, the reaction mixture was poured into water (80 mL), and the mixture was extracted with CH<sub>2</sub>Cl<sub>2</sub>. The solvent was evaporated under reduced pressure. The mixture was purified by column chromatography (silica gel, CH<sub>2</sub>Cl<sub>2</sub>). Yield: 0.5 g (73.8%). Oily product. <sup>1</sup>H NMR (400 MHz, CDCl<sub>3</sub>) δ = 7.08–7.03 (m, 3H), 6.96 (d, *J* = 5.2 Hz, 1H), 4.20–4.15 (m, 2H), 3.76 (s, 2H), 3.37 (s, 2H), 2.89–2.83 (m, 4H), 1.27–1.23 (m, 3H). HRMS (ESI<sup>+</sup>): Calcd C<sub>13</sub>H<sub>17</sub>NO<sub>2</sub> [M+H]<sup>+</sup> *m/z* = 220.1559; Found *m/z* = 220.1508.

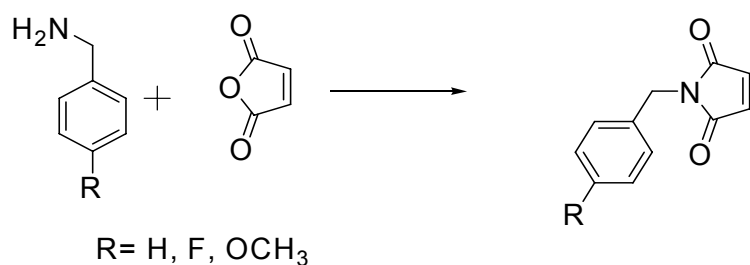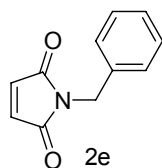

### Synthesis of **2e**

Benzylamine (0.54g, 5 mmol) were dissolved in 2 mL CHCl<sub>3</sub>. Maleic anhydride (0.49g, 5mmol) was dissolved in another portion of CHCl<sub>3</sub> (10 mL). Maleic anhydride solution was dropped into the aniline derivatives slowly, the reaction mixture was stirred for 3 h at room temperature. A lot of precipitation appeared. The precipitation was collected by filtration. The filtrate was dissolved in acetic anhydride (5 mL) and acetic acid-sodium (6 mmol) was added. The mixture was heated at 138°C for 3 h. The reaction was cooled and quenched with water; then, the aqueous solution was extracted with DCM, dried with Na<sub>2</sub>SO<sub>4</sub>, filtered, and the solvent was evaporated. The product was purified by silica gel column.(silica gel, CH<sub>2</sub>Cl<sub>2</sub>). Yield: 0.5 g (53.9%). <sup>1</sup>H NMR (400 MHz, CDCl<sub>3</sub>) δ = 7.33–7.29 (m, 5H), 6.71 (s, 2H), 4.68 (s, 2H). HRMS (ESI+): Calcd C<sub>10</sub>H<sub>7</sub>NO<sub>2</sub> [M+H]<sup>+</sup> m/z = 188.0706; Found m/z = 188.0704.

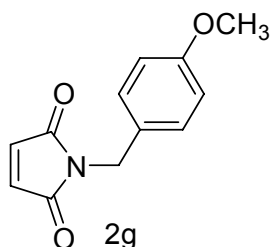

### Synthesis of **2g**

4-methoxybenzylamine (0.82g, 6 mmol) were dissolved in 2 mL CHCl<sub>3</sub>. Maleic anhydride (0.6g, 6mmol) was dissolved in another portion of CHCl<sub>3</sub> (10 mL). Maleic anhydride solution was dropped into the aniline derivatives slowly, the reaction mixture was stirred for 3 h at room temperature. A lot of precipitation appeared. The precipitation was collected by filtration. The filtrate was dissolved in acetic anhydride (5 mL) and acetic acid-sodium (6 mmol) was added. The mixture was heated at 138°C for 3 h. The reaction was cooled and quenched with water; then, the aqueous solution was

extracted with DCM, dried with Na<sub>2</sub>SO<sub>4</sub>, filtered, and the solvent was evaporated. The product was purified by silica gel column.(silica gel, CH<sub>2</sub>Cl<sub>2</sub>). Yield: 0.7 g (53.2%). <sup>1</sup>H NMR (400 MHz, CDCl<sub>3</sub>) δ = 7.30 (d, *J* = 8.5 Hz, 2H), δ = 6.85 (d, *J* = 8.7 Hz, 2H), 6.68 (s, 2H), 4.61 (s, 2H), 3.78 (s, 3H). HRMS (ESI+): Calcd C<sub>10</sub>H<sub>7</sub>NO<sub>2</sub> [M+H]<sup>+</sup> *m/z* = 218.0812. Found *m/z* = 218.0818.

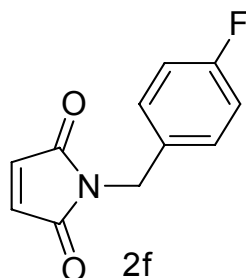

#### Synthesis of **2f**

4-fluorobenzylamine (0.8g, 6.4 mmol) were dissolved in 2 mL CHCl<sub>3</sub>. Maleic anhydride (0.7g, 7mmol) was dissolved in another portion of CHCl<sub>3</sub> (10 mL). Maleic anhydride solution was dropped into the aniline derivatives slowly, the reaction mixture was stirred for 3 h at room temperature. A lot of precipitation appeared. The precipitation was collected by filtration. The filtrate was dissolved in acetic anhydride (6 mL) and acetic acid-sodium (6 mmol) was added. The mixture was heated at 138°C for 3 h. The reaction was cooled and quenched with water; then, the aqueous solution was extracted with DCM, dried with Na<sub>2</sub>SO<sub>4</sub>, filtered, and the solvent was evaporated. The product was purified by silica gel column.(silica gel, CH<sub>2</sub>Cl<sub>2</sub>). Yield: 0.8 g (40.1%). <sup>1</sup>H NMR (400 MHz, CDCl<sub>3</sub>) δ = 7.34–7.31 (m, 2H), δ = 6.99 (t, *J* = 8.6 Hz, 2H), 6.70 (s, 2H), 4.63 (s, 2H). HRMS (ESI+): Calcd C<sub>10</sub>H<sub>8</sub>FNO<sub>2</sub> [M+H]<sup>+</sup> *m/z* = 206.0612; Found *m/z* = 206.0607.

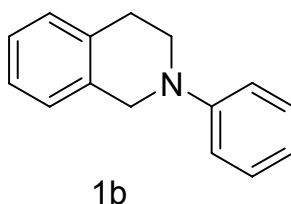

#### Synthesis of **1b**

**A** (2 ml, 15 mmol), iodobenzene (1.12ml, 10 mmol) and K<sub>3</sub>PO<sub>4</sub> (20 mmol) was dissolved in mixture solution of 1.11ml glycol and 10 ml isopropanol, then add 200mg CuI into the solution under Ar. The mixture was stirred at 90 °C for 24 h. When the reaction was completed, the reaction mixture was poured into DCM (80 mL), and suction filtration. The solvent was evaporated under reduced pressure.

The mixture was purified by column chromatography (silica gel, CH<sub>2</sub>Cl<sub>2</sub>). Yield: 0.62 g (29.7%). <sup>1</sup>H NMR (400 MHz, CDCl<sub>3</sub>) δ = 7.36–7.31 (2, 4H), 7.23–7.21 (m, 4H), 7.04 (d, *J* = 8.3 Hz, 2H), 6.89–6.86 (m, 1H), 4.45 (s, 2H), 3.60 (t, *J* = 5.5 Hz, 2H), 3.03 (t, *J* = 5.5 Hz, 2H).

**The general procedure for oxidation/[3+2] cycloaddition/aromatization tandem reaction with tetrahydroisoquinoline derivatives catalyzed by organic triplet photosensitizers B-1 and B-2**

Dissolved **1** (0.15 mmol), photosensitizers (1 mmol%) and **2** (0.1 mmol) into 5 mL dichloroform. The solution was then irradiated using a 35 W xenon lamp through a cut off filter (0.72 M NaNO<sub>2</sub> aqueous solution, which is transparent for light > 385 nm). Thin layer chromatography (TLC) was used to monitor the progress of the reaction. NBS (25 mg) is added into reactor. Then another 5 min, remove the solvents, The residue was purified by column chromatography (silica gel, DCM). Yield: Please refer to table 3.

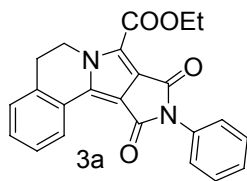

<sup>1</sup>H NMR (400 MHz, CDCl<sub>3</sub>) δ = 8.60 (d, *J* = 7.2 Hz, 1H), 7.29–7.51 (m, 8H), 4.79 (t, *J* = 6.9 Hz, 2H), 4.47–4.41 (m, 2H), 3.19 (t, *J* = 6.4 Hz, 2H), 1.47 (t, *J* = 7.2 Hz, 3H). HRMS (EI<sup>+</sup>): Calcd C<sub>23</sub>H<sub>17</sub>N<sub>2</sub>O<sub>4</sub> [M<sup>+</sup>] *m/z* = 386.1267. Found *m/z* = 386.1270. <sup>13</sup>C NMR (125 MHz, CDCl<sub>3</sub>): 163.2, 161.5, 159.5, 128.9, 128.0, 127.5, 125.5, 118.6, 116.3, 61.6, 43.4, 29.7, 28.0, 14.2.

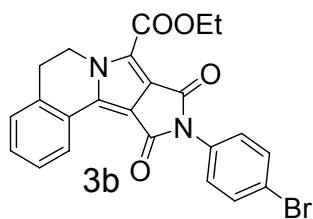

<sup>1</sup>H NMR (400 MHz, CDCl<sub>3</sub>) δ = 8.57 (d, *J* = 8.0 Hz, 1H), 7.62 (d, *J* = 8.3 Hz, 2H), 7.43–7.31 (m, 5H), 4.79 (t, *J* = 6.0 Hz, 2H), 4.47–4.41 (m, 2H), 3.19 (t, *J* = 8.6 Hz, 2H), 1.47 (t, *J* = 7.2 Hz, 3H). <sup>13</sup>C NMR (125 MHz,



CDCl<sub>3</sub>): 162.7, 161.2, 159.6, 133.8, 132.1, 130.5, 128.6, 125.3, 125.1, 121.5, 118.8, 115.9, 61.8, 43.6, 29.7, 28.4, 14.2. HRMS (ESI<sup>+</sup>): Calcd C<sub>23</sub>H<sub>17</sub>N<sub>2</sub>O<sub>4</sub>NaBr [M+Na]<sup>+</sup> m/z = 487.0269. Found m/z = 487.0261.

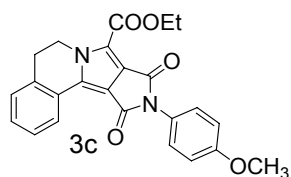

<sup>1</sup>H NMR (400 MHz, CDCl<sub>3</sub>) δ = 8.59 (d, *J* = 7.5 Hz, 1H), 7.44–7.29 (m, 5H), 7.01 (d, *J* = 9.0 Hz, 2H), 4.78 (t, *J* = 5.9 Hz, 2H), 4.46–4.40 (m, 2H), 3.85 (s, 3H), 3.19 (d, *J* = 6.2 Hz, 2H), 1.47 (t, *J* = 7.0 Hz, 3H). <sup>13</sup>C NMR (125 MHz, CDCl<sub>3</sub>): 163.5, 162.1, 159.9, 159.2, 130.4, 128.6, 127.8, 125.5, 118.9, 116.4, 114.5, 61.8, 55.6, 43.5, 28.5, 14.3.

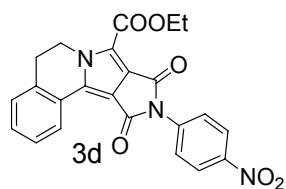

<sup>1</sup>H NMR (400 MHz, CDCl<sub>3</sub>) δ = 8.56 (t, *J* = 7.2 Hz, 1H), 8.36 (d, *J* = 9.2 Hz, 1H), 7.72 (d, *J* = 8.8 Hz, 2H), 7.46–7.40 (m, 2H), 7.33 (d, *J* = 7.2 Hz, 1H), 4.80 (t, *J* = 7.2 Hz, 2H), 4.48–4.43 (m, 2H), 3.22 (t, *J* = 6.4 Hz, 2H), 1.50 (t, *J* = 6.8 Hz, 3H). <sup>13</sup>C NMR (100 MHz, CDCl<sub>3</sub>): 162.3, 160.9, 159.7, 146.5, 138.7, 132.7, 130.9, 128.0, 127.0, 124.3, 119.4, 115.8, 62.0, 43.7, 28.4, 14.4. HRMS (EI<sup>+</sup>) Calcd for C<sub>23</sub>H<sub>17</sub>N<sub>3</sub>O<sub>6</sub> [M<sup>+</sup>] m/z = 431.1117. Found m/z = 431.1126.

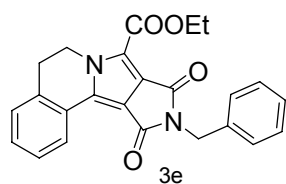

<sup>1</sup>H NMR (400 MHz, CDCl<sub>3</sub>) δ = 8.54 (d, *J* = 7.7 Hz, 1H), 7.45–7.23 (m, 8H), 4.80–4.70 (m, 4H), 4.45–4.40 (m, 4H), 3.14 (t, *J* = 7.2 Hz, 2H), 1.48 (d, *J* = 7.0 Hz, 3H). <sup>13</sup>C NMR (100 MHz, CDCl<sub>3</sub>): 164.0, 162.4, 159.8,

130.3, 128.6, 128.0, 127.8, 125.7, 118.4, 116.7, 61.7, 43.5, 42.0, 28.5, 14.7. HRMS (ESI+): Calcd C<sub>24</sub>H<sub>20</sub>N<sub>2</sub>O<sub>4</sub>Na [M+Na]<sup>+</sup> m/z = 423.1315. Found m/z = 423.1317.

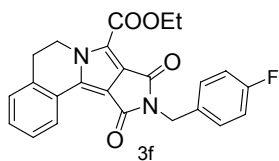

<sup>1</sup>H NMR (400 MHz, CDCl<sub>3</sub>) δ = 8.53 (d, *J* = 7.7 Hz, 1H), 7.44–7.27 (m, 5H), 6.98 (t, *J* = 8.7 Hz, 2H), 4.76–4.70 (m, 4H), 4.46–4.41 (m, 2H), 3.14 (t, *J* = 6.7 Hz, 2H), 1.48 (d, *J* = 7.1 Hz, 3H). <sup>13</sup>C NMR (125 MHz, CDCl<sub>3</sub>): 164.0, 163.5, 162.2, 161.1, 159.5, 132.4, 130.6, 128.0, 125.6, 118.6, 116.5, 115.5, 61.4, 43.1, 41.1, 28.2, 14.1. HRMS (ESI+): Calcd C<sub>24</sub>H<sub>19</sub>FN<sub>2</sub>O<sub>4</sub>Na [M+Na]<sup>+</sup> m/z = 441.1221. Found m/z = 441.1219.

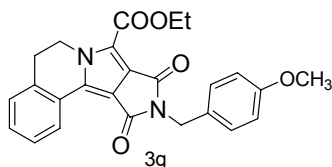

<sup>1</sup>H NMR (400 MHz, CDCl<sub>3</sub>) δ = 8.53 (d, *J* = 7.5 Hz, 1H), 7.42–7.25 (m, 5H), 6.84 (d, *J* = 6.4 Hz, 2H), 4.73–4.70 (m, 4H), 4.46–4.40 (m, 2H), 3.77 (s, 3H), 1.48 (d, *J* = 7.3 Hz, 3H). <sup>13</sup>C NMR (125 MHz, CDCl<sub>3</sub>): 163.9, 162.2, 159.8, 159.1, 130.0, 129.5, 127.6, 125.7, 118.4, 116.7, 113.8, 61.5, 55.4, 43.3, 41.4, 28.4, 14.3. HRMS (ESI+): Calcd C<sub>25</sub>H<sub>22</sub>N<sub>2</sub>O<sub>5</sub>Na [M+Na]<sup>+</sup> m/z = 453.1426. Found m/z = 453.1409.

### The general procedure for the photocatalytic aerobic oxidation and metal catalyzed alkylation reactions

To a dry flask were added **B-1** or **B-2** (1 mol%), tetrahydroisoquinoline derivatives (0.1 mmol), acetylene derivatives (5 eq). The reaction mixture was stirred at room temperature (rt) under air atmosphere. The solution was then irradiated using a 35 W xenon lamp through a cut off filter (0.72 M NaNO<sub>2</sub> aqueous solution, which is transparent for light > 385 nm). Thin layer chromatography (TLC) was used to monitor the progress of the reaction. After the completion of the reaction, the solvent was evaporated under reduced pressure. The residue was purified by column chromatography (silica gel, dichloromethane). Yield: please refer to Table 5.

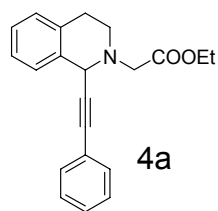

$^1\text{H}$  NMR (400 MHz,  $\text{CDCl}_3$ ): 7.41-7.11 (m, 9H), 5.11 (s, 1H), 4.25-4.20 (m, 2H), 3.74-3.56 (m, 2H), 3.13-2.83 (m, 4H), 1.29 (t, 3H,  $J = 7.2$  Hz).  $^{13}\text{C}$  NMR (100 MHz,  $\text{CDCl}_3$ ): 170.8, 143.9, 133.6, 131.9, 129.1, 128.3, 127.8, 127.2, 126.1, 123.0, 94.6, 87.0, 60.9, 56.7, 54.9, 46.8, 29.0, 14.4.

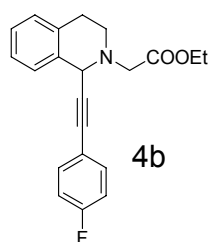

$^1\text{H}$  NMR (400 MHz,  $\text{CDCl}_3$ ): 7.40-7.29 (m, 3H), 7.19-7.14 (m, 3H), 6.99-6.95 (m, 2H), 5.09 (s, 1H), 4.25-4.20 (m, 2H), 3.73-3.55 (m, 2H), 3.11-2.84 (m, 2H), 1.30 (t, 3H,  $J = 7.0$  Hz).  $^{13}\text{C}$  NMR (100 MHz,  $\text{CDCl}_3$ ): 170.8, 129.1, 127.8, 127.2, 119.1, 115.7, 86.9, 86.0, 60.6, 56.6, 54.8, 46.6, 29.0, 14.4.

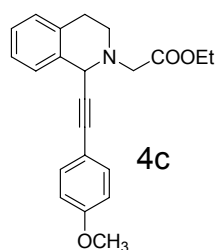

$^1\text{H}$  NMR (400 MHz,  $\text{CDCl}_3$ ): 7.53-7.31 (m, 3H), 7.18-7.12 (m, 3H), 6.81 (d, 2H,  $J = 8.3$  Hz), 5.11 (s, 1H), 4.25-4.20 (m, 2H), 3.79 (s, 3H), 3.75-3.57 (m, 2H), 3.15-2.86 (m, 4H), 1.30 (t, 3H,  $J = 7.0$  Hz).  $^{13}\text{C}$  NMR (100 MHz,  $\text{CDCl}_3$ ): 170.8, 133.4, 129.1, 127.8, 127.2, 126.0, 114.0, 86.8, 85.4, 60.9, 56.8, 55.0, 47.0, 29.9, 29.0, 14.4.

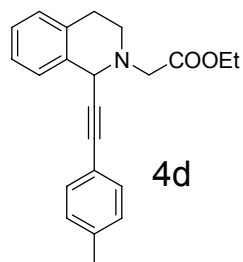

$^1\text{H}$  NMR (400 MHz,  $\text{CDCl}_3$ ): 7.31-7.29 (m, 3H), 7.18-7.07 (m, 6H), 5.11 (s, 1H), 4.25-4.20 (m, 2H), 3.74-3.56 (m, 2H), 3.14-2.85 (m, 4H), 2.33 (s, 1H), 1.29 (t, 3H,  $J = 7.0$  Hz).  $^{13}\text{C}$  NMR (100 MHz,  $\text{CDCl}_3$ ): 170.7, 138.4, 131.8, 129.1, 127.9, 127.2, 126.1, 120.2, 87.1, 86.1, 61.1, 56.6, 54.8, 46.4, 28.8, 21.7, 14.2.

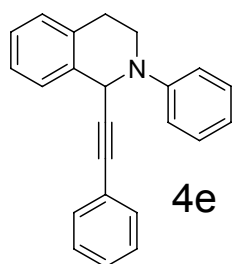

$^1\text{H}$  NMR (400 MHz,  $\text{CDCl}_3$ ): 7.38-7.13 (m, 13H), 6.92-6.88 (m, 1H), 5.65 (s, 1H), 3.68-3.61 (m, 2H), 3.12-2.90 (m, 2H).  $^{13}\text{C}$  NMR (100 MHz,  $\text{CDCl}_3$ ): 149.7, 135.5, 134.5, 131.8, 129.3, 129.0, 128.2, 126.4, 123.1, 119.7, 116.8, 88.8, 84.9, 78.0, 77.2, 76.9, 52.4, 43.5, 29.0.

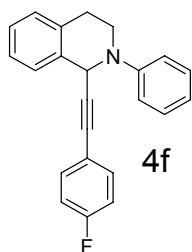

$^1\text{H}$  NMR (400 MHz,  $\text{CDCl}_3$ ): 7.40-7.29 (m, 3H), 7.19-7.14 (m, 3H), 6.99-6.95 (m, 2H), 5.09 (s, 1H), 4.25-4.20 (m, 2H), 3.73-3.55 (m, 2H), 3.12-2.84 (m, 4H), 1.29 (t, 3H,  $J = 7.0$  Hz).  $^{13}\text{C}$  NMR (100 MHz,  $\text{CDCl}_3$ ): 170.8, 129.1, 127.8, 127.2, 119.1, 115.7, 86.9, 86.0, 60.6, 56.6, 54.8, 46.6, 29.0, 14.4.

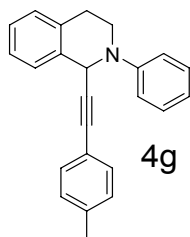

$^1\text{H}$  NMR (400 MHz,  $\text{CDCl}_3$ ): 7.45-6.97 (m, 15H), 5.65 (s, 1H), 3.81-3.76 (m, 2H), 3.22-3.04 (m, 2H), 2.37 (s, 3H).  $^{13}\text{C}$  NMR (125 MHz,  $\text{CDCl}_3$ ): 149.6, 138.4, 134.4, 131.7, 128.9, 127.2, 126.3, 119.6, 116.7, 87.9, 84.9, 52.4, 43.5, 28.9, 21.3.

## 2. NMR and HRMS spectra

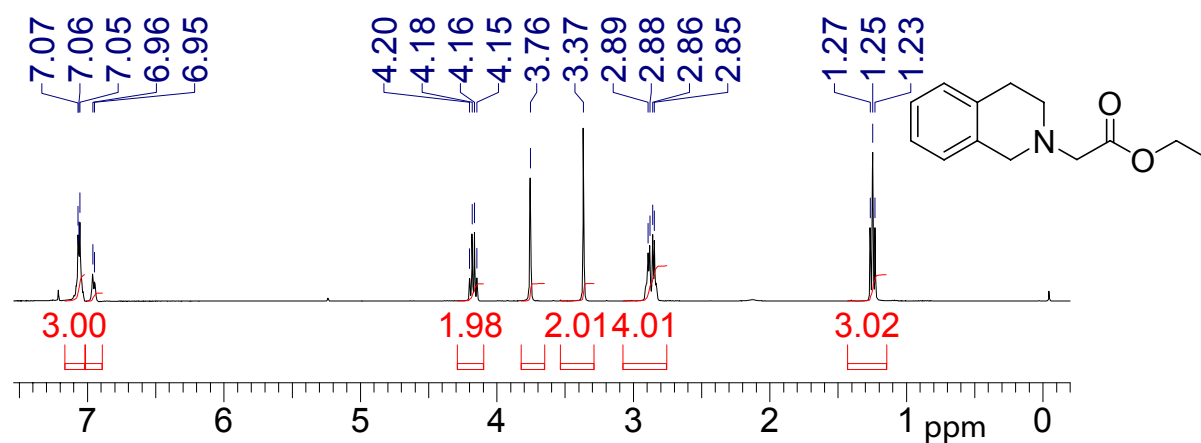

**Fig. S1**  $^1\text{H}$  NMR of **1** (400 MHz, In  $\text{CDCl}_3$ ).

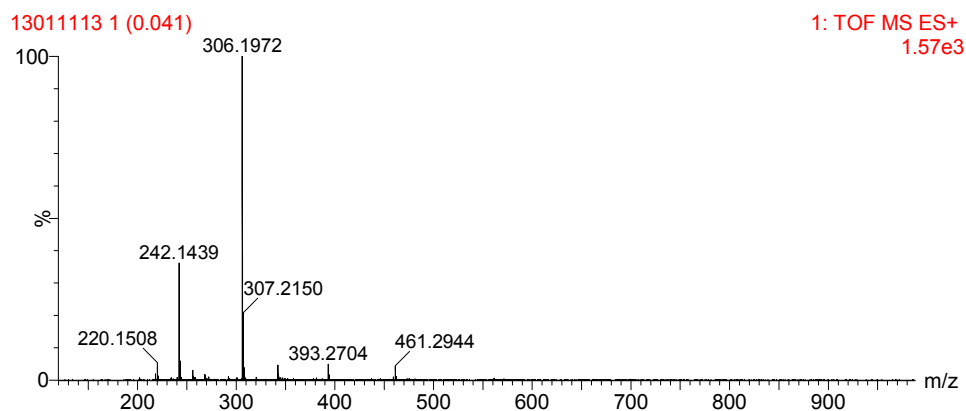

**Fig. S2** TOF HRMS ESI+ of **1**.

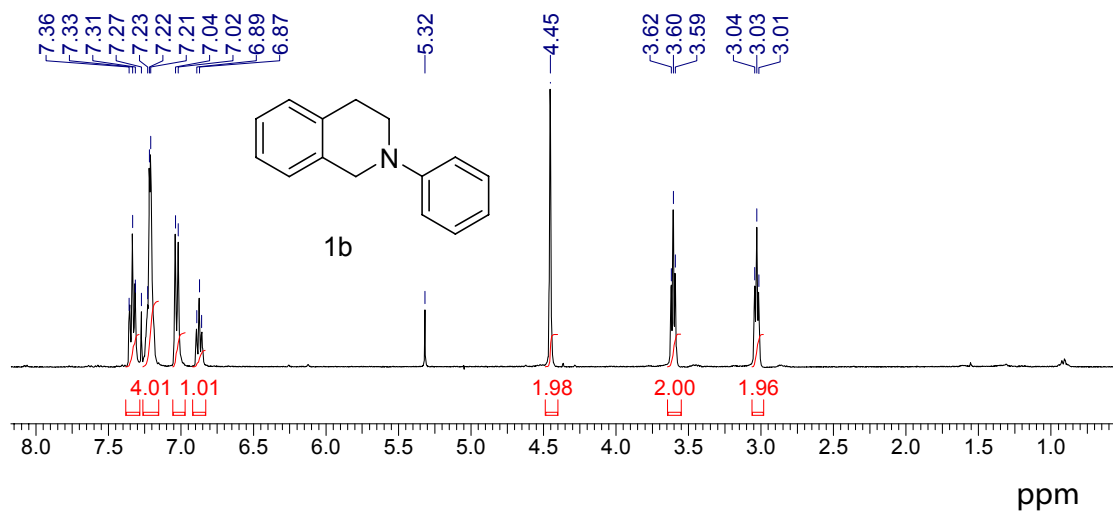

**Fig.S3** <sup>1</sup>H NMR of **1b** (400MHz. In CDCl<sub>3</sub>).

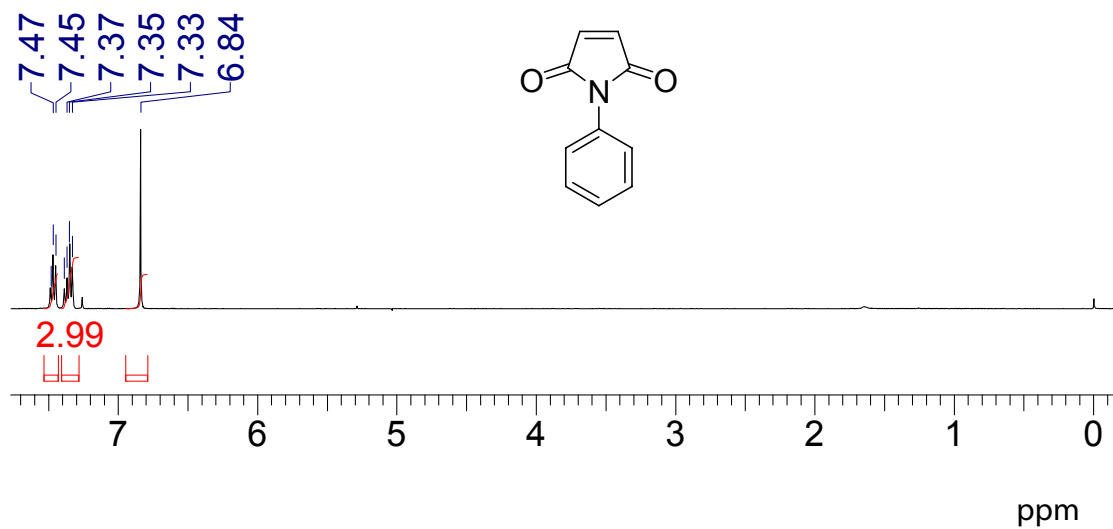

**Fig.S4** <sup>1</sup>H NMR of **2a** (400MHz. In CDCl<sub>3</sub>).

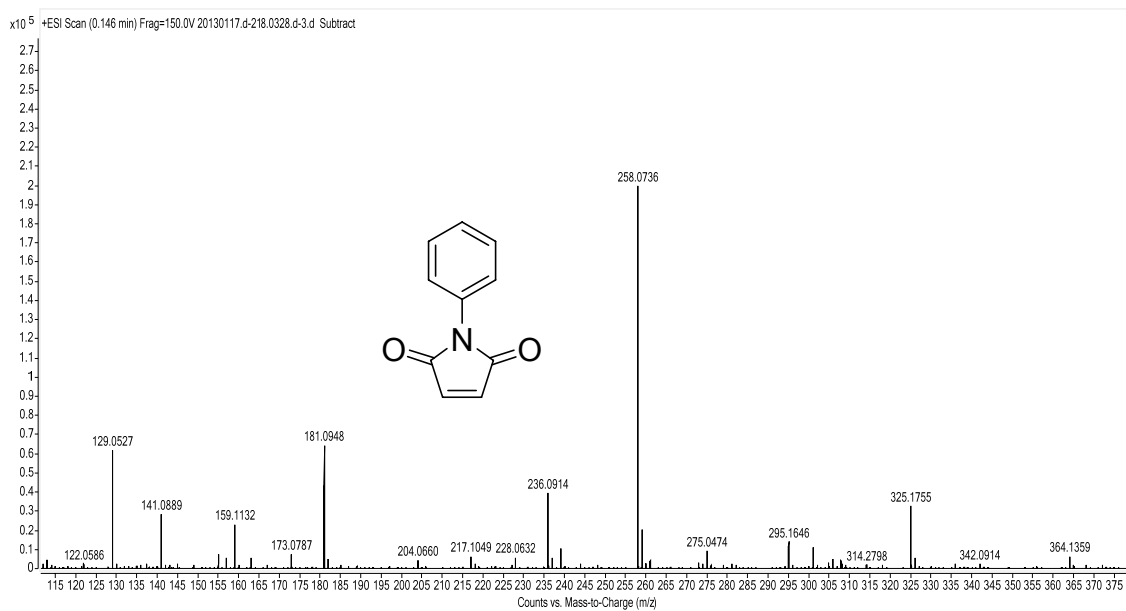

**Fig. S5** TOF HRMS ESI+ of **2a**.

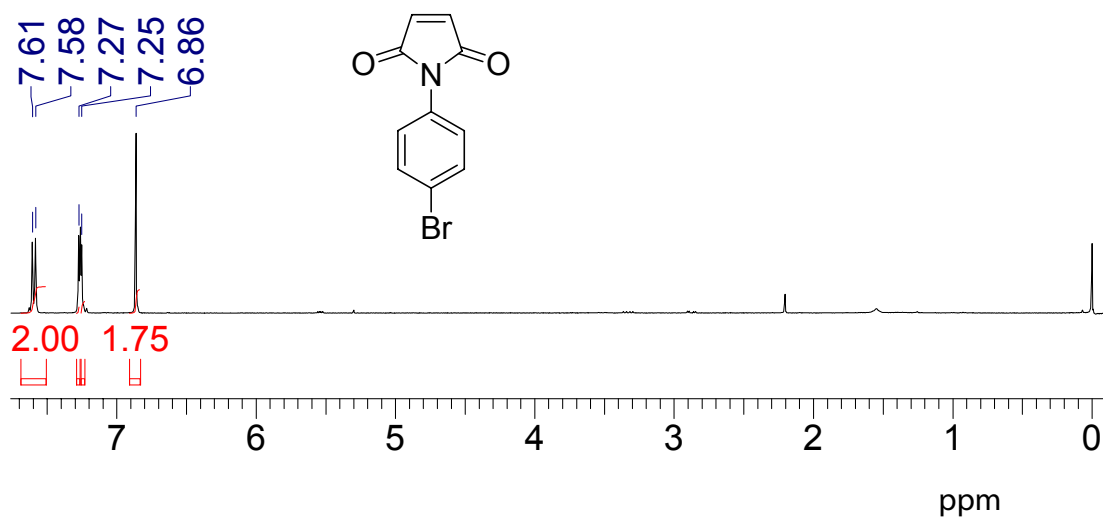

**Fig. S6** <sup>1</sup>H NMR of **2b** in CDCl<sub>3</sub> (400 MHz).

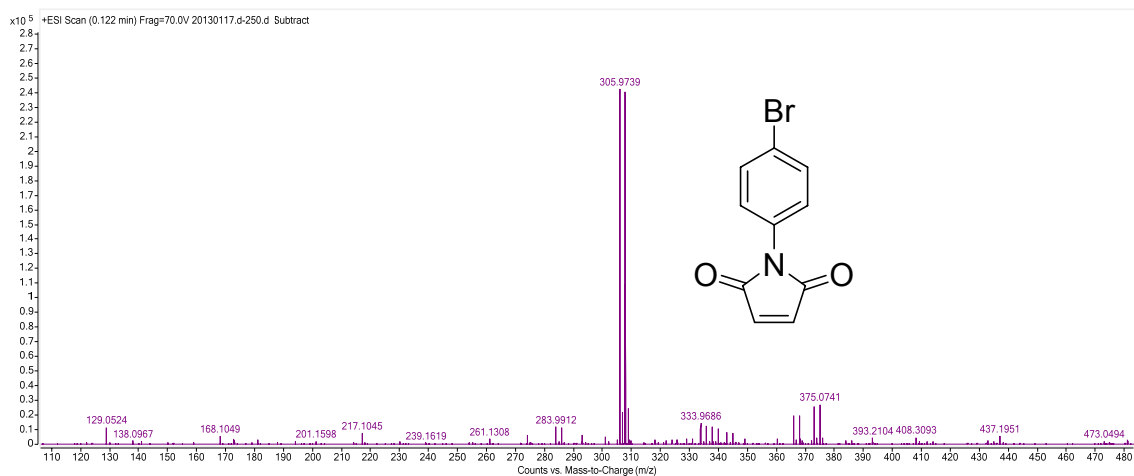

**Fig. S7** TOF HRMS ESI+ of **2b**.

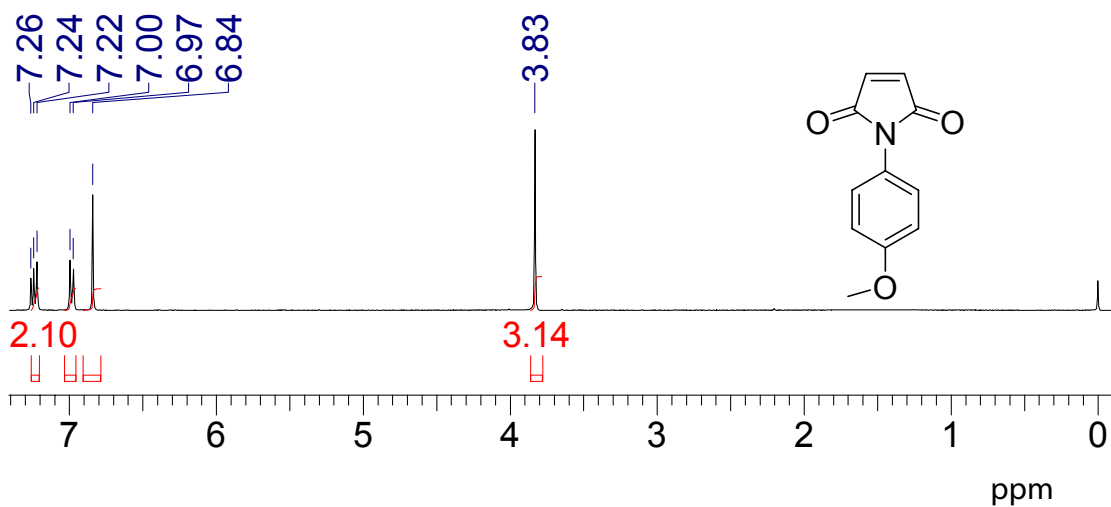

**Fig. S8** <sup>1</sup>H NMR of **2c** (400 MHz. In CDCl<sub>3</sub>).



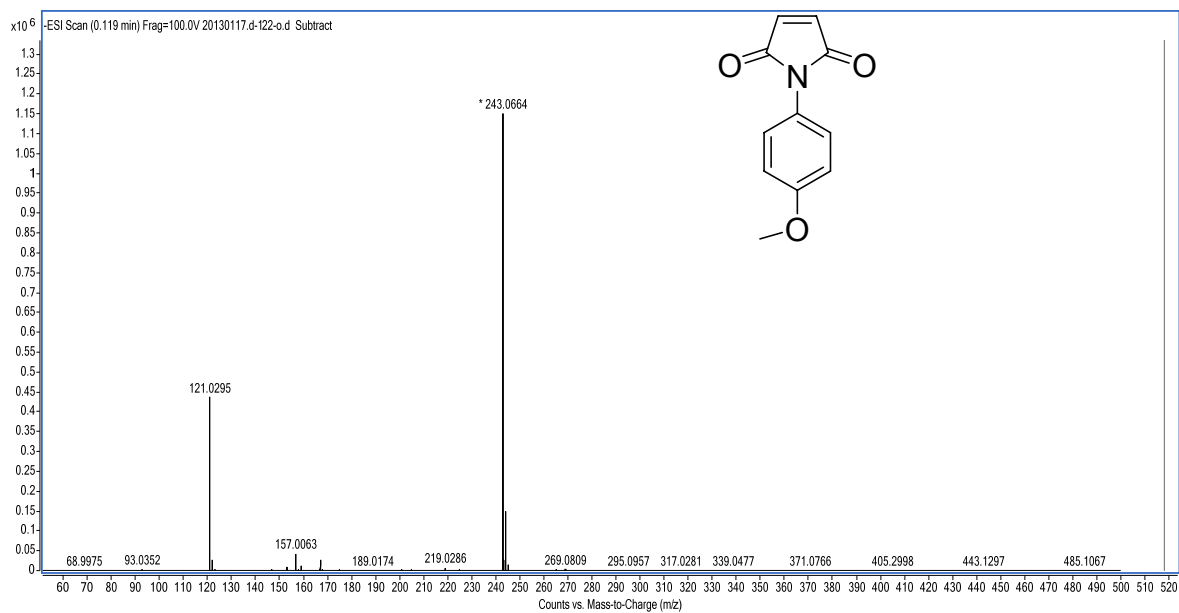

**Fig. S9** TOF HRMS ESI+ of **2c**.

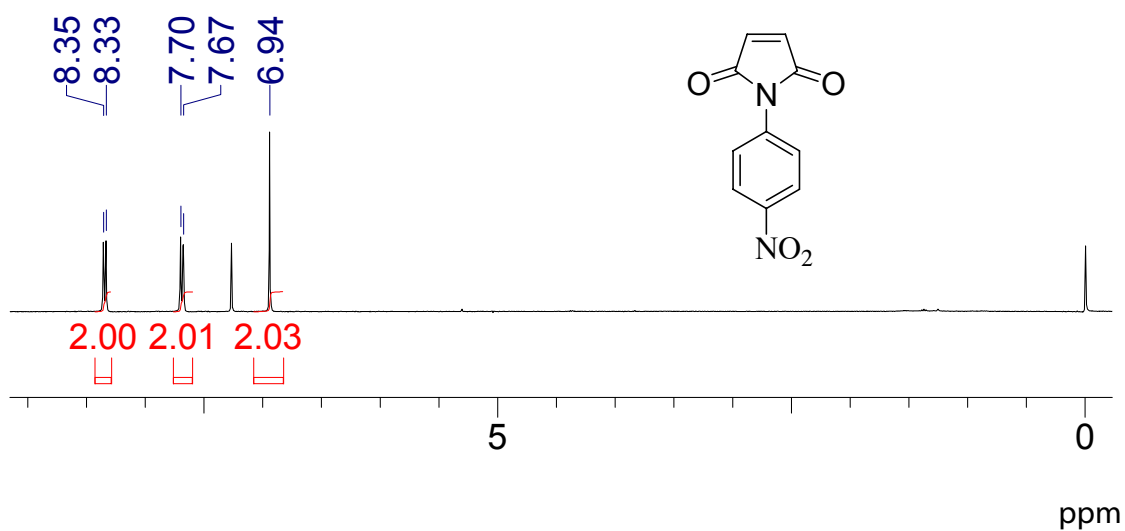

**Fig. S10** <sup>1</sup>H NMR of **2d** (400 MHz. In CDCl<sub>3</sub>).

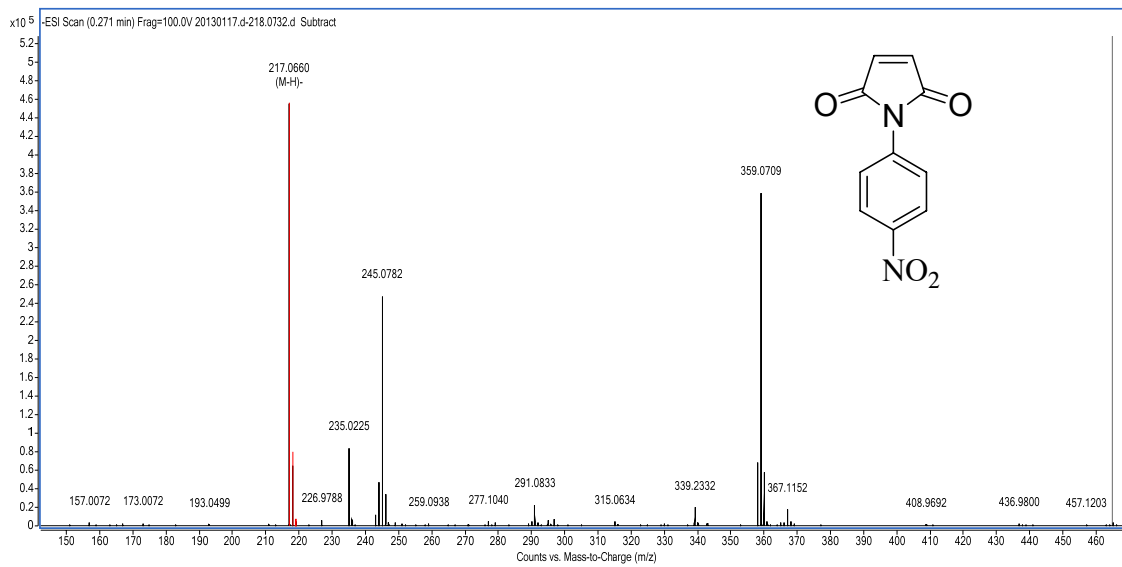

**Fig. S11** TOF HRMS ESI+ of **2d**.

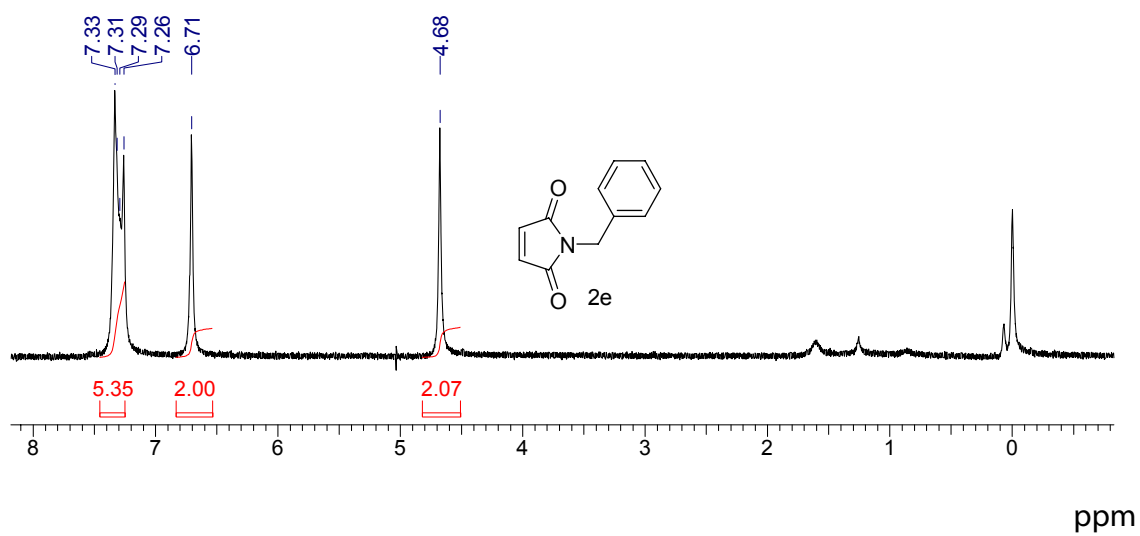

**Fig. S12** <sup>1</sup>H NMR of **2e** (400 MHz. In CDCl<sub>3</sub>).

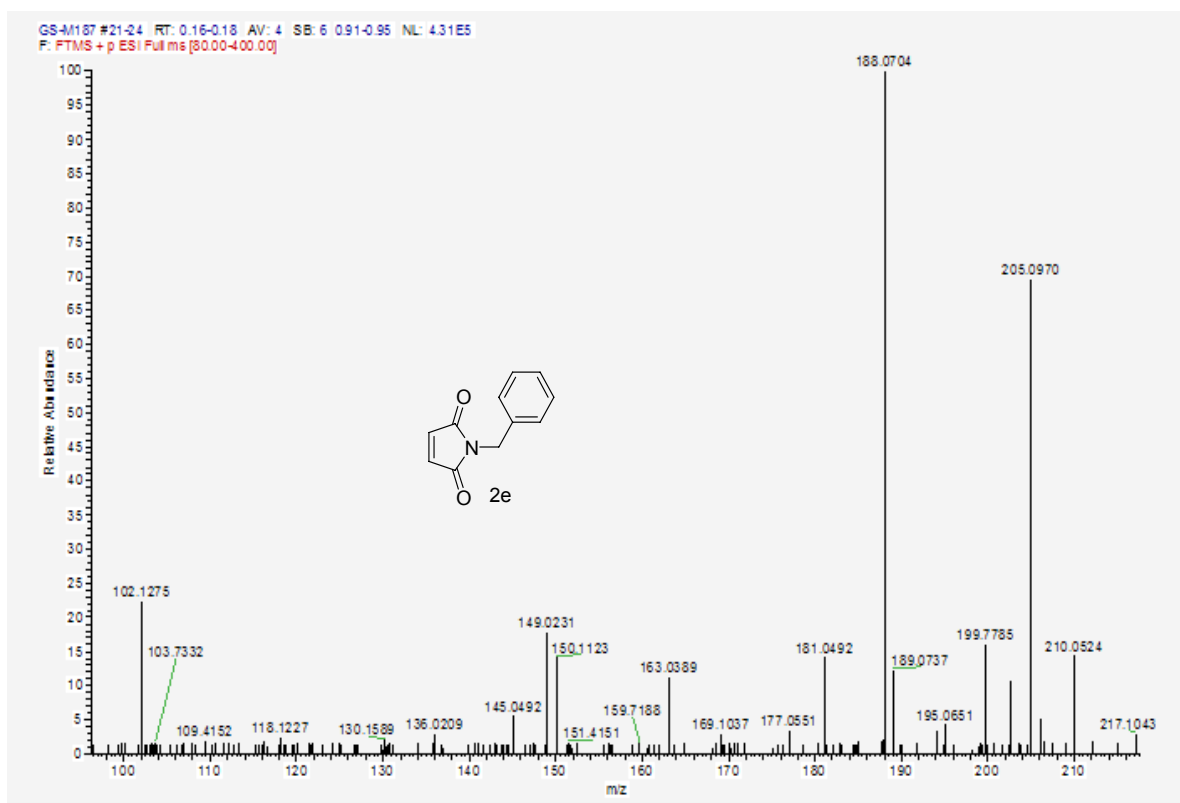

**Fig. S13** TOF HRMS ESI+ of **2e**.

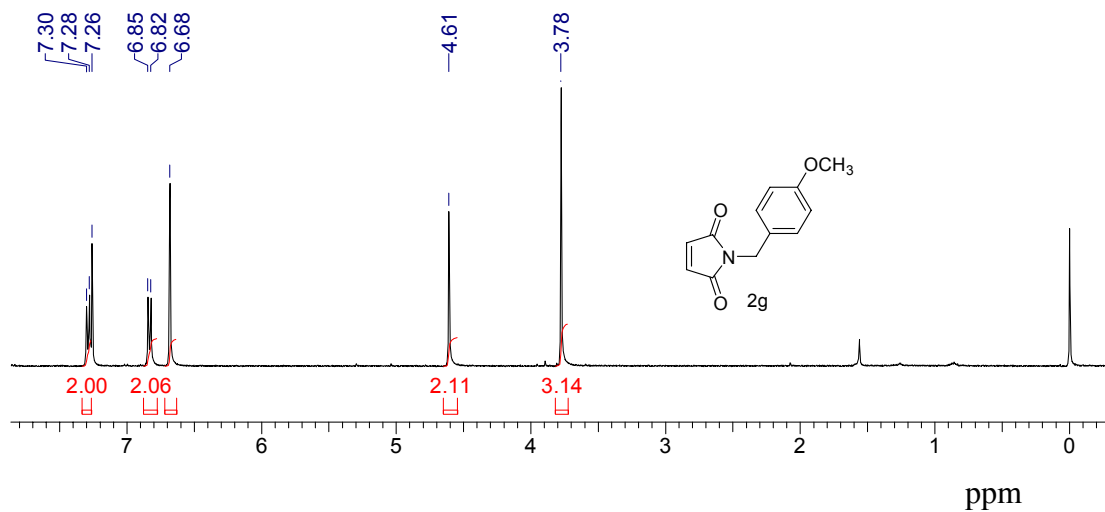

**Fig. S14**  $^1\text{H}$  NMR of **2g** (400 MHz,  $\text{CDCl}_3$ ).

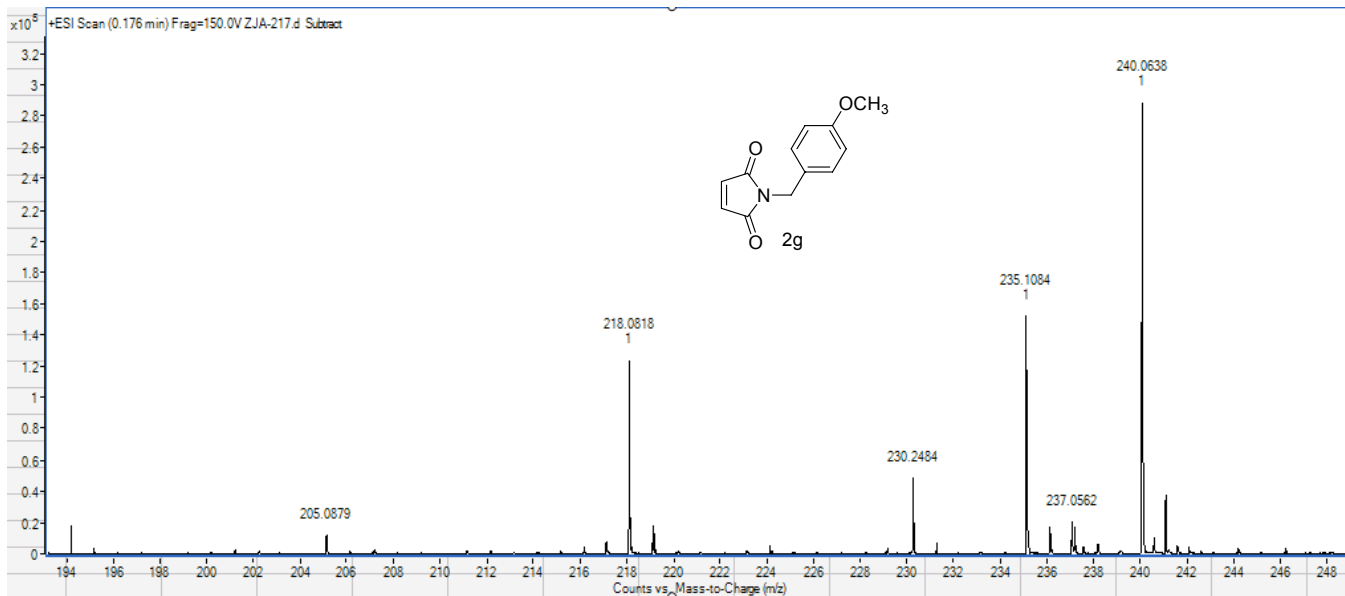

**Fig. S15** TOF HRMS ESI+ of **2g**.

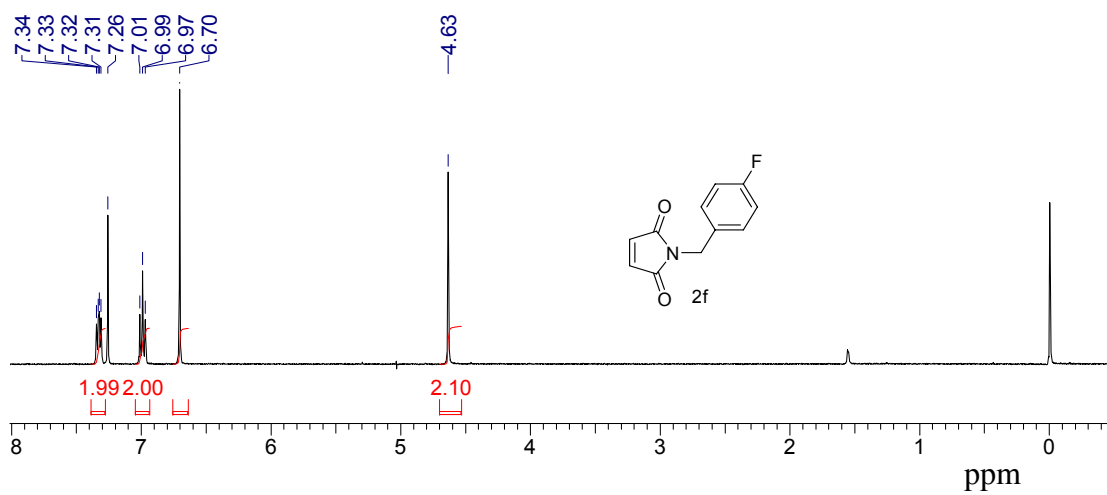

**Fig. S16** <sup>1</sup>H NMR of **2f** (400 MHz, CDCl<sub>3</sub>).

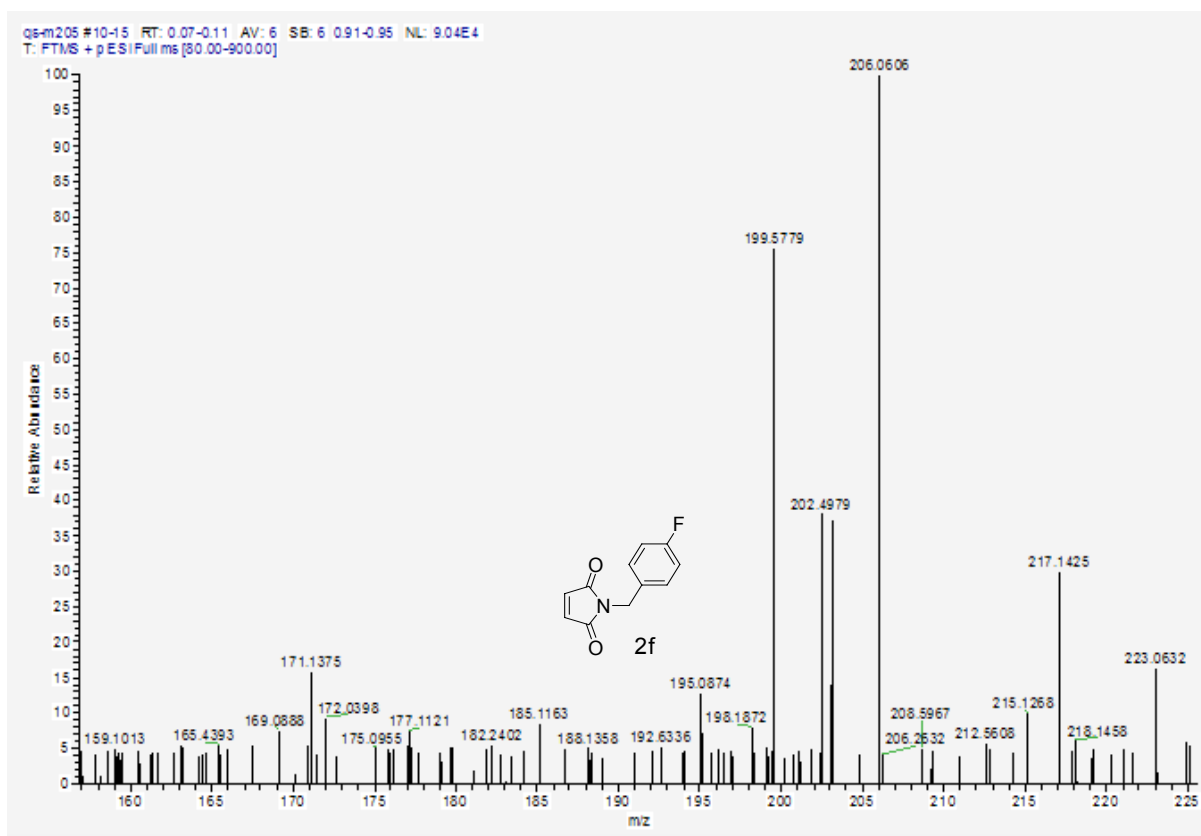

**Fig. S17** TOF HRMS ESI<sup>+</sup> of **2f**.

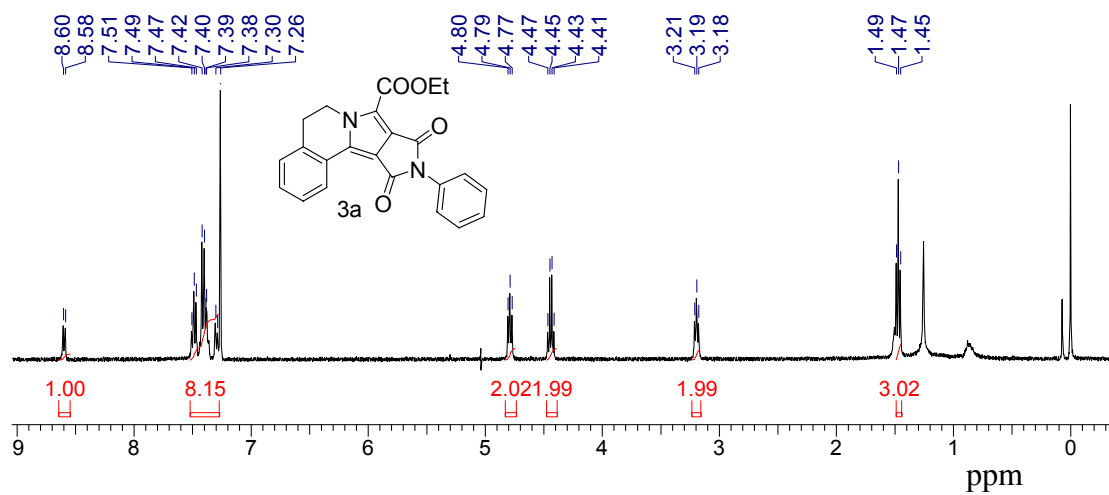

**Fig. S18** <sup>1</sup>H NMR of **3a** (400 MHz, In CDCl<sub>3</sub>).

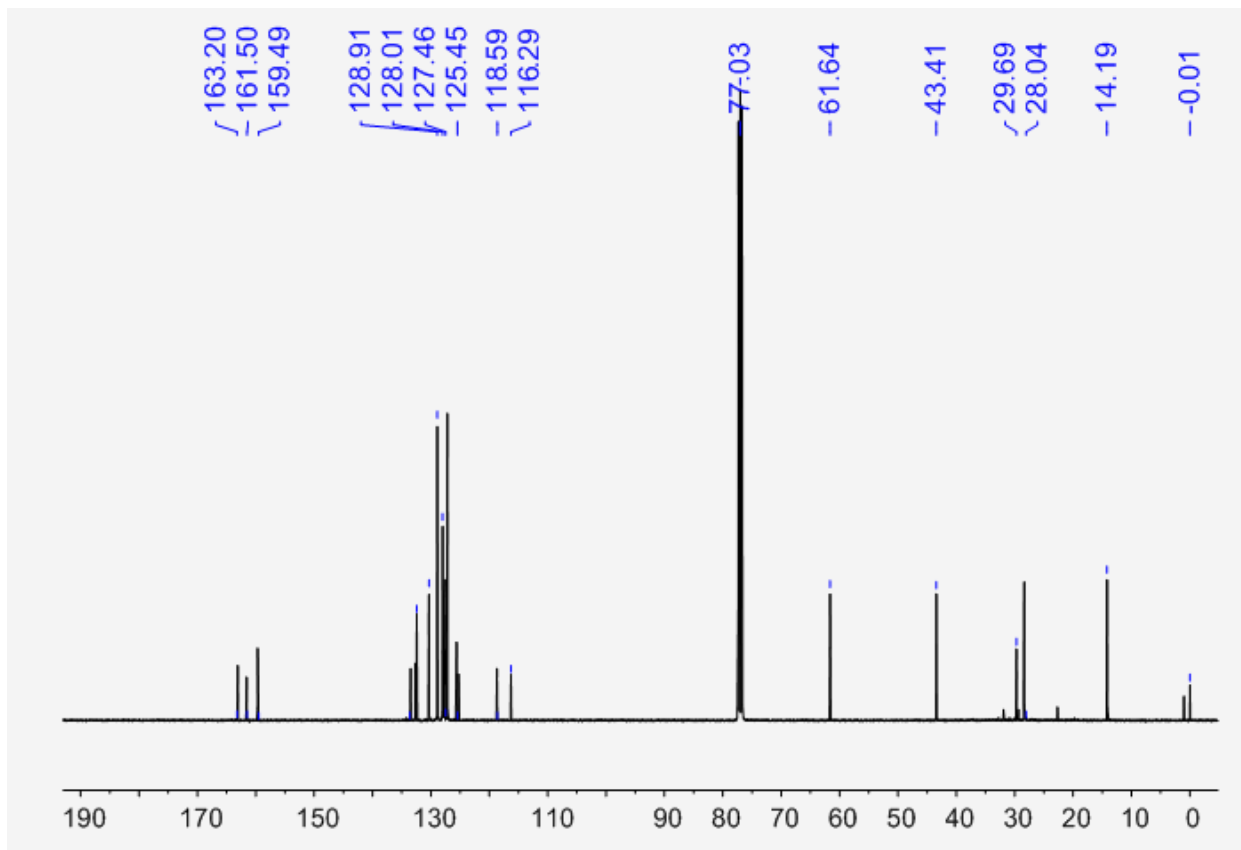

**Fig. S19**  $^{13}\text{C}$  NMR of **3a** (125 MHz. In  $\text{CDCl}_3$ ).

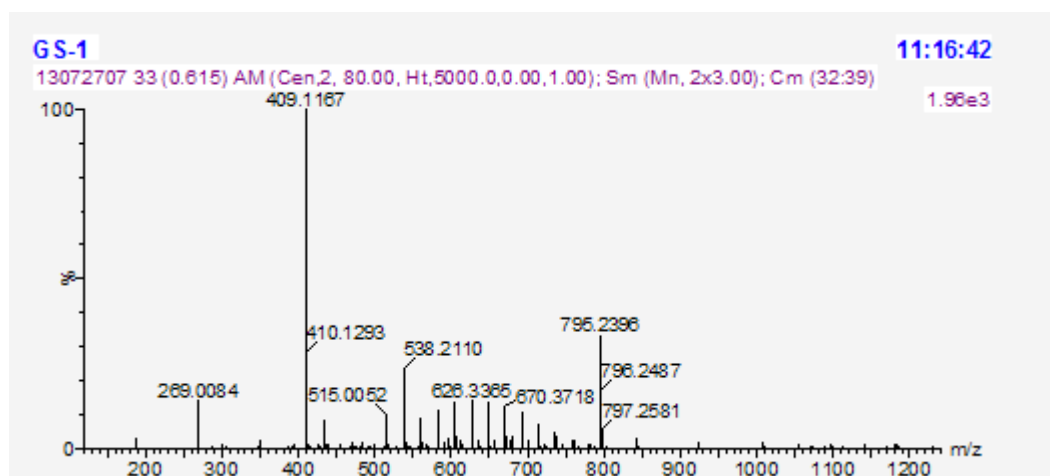

**Fig. S20** TOF HRMS ESI<sup>+</sup> of **3a**.

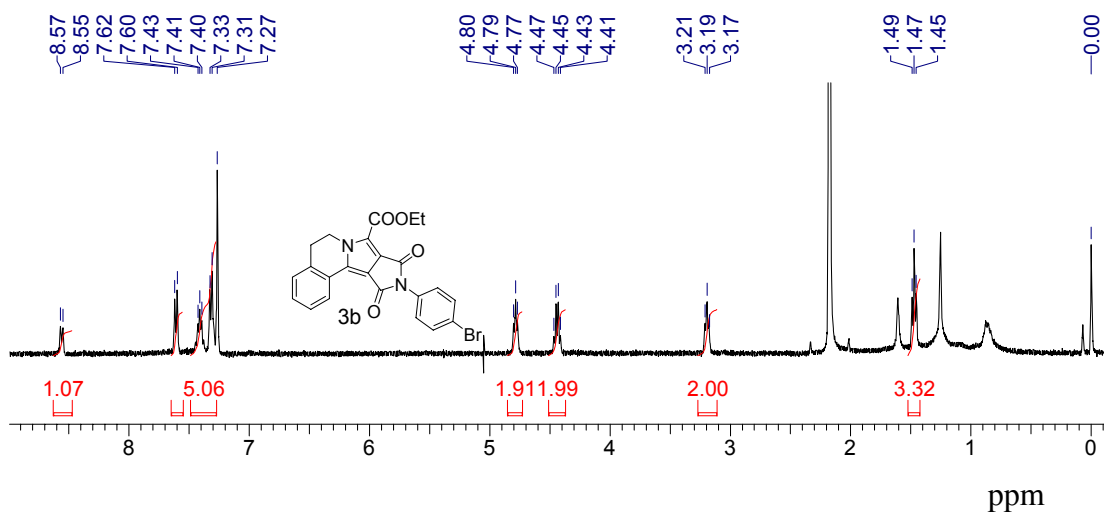

**Fig. S21** <sup>1</sup>H NMR of **3b** (400 MHz. In CDCl<sub>3</sub>).

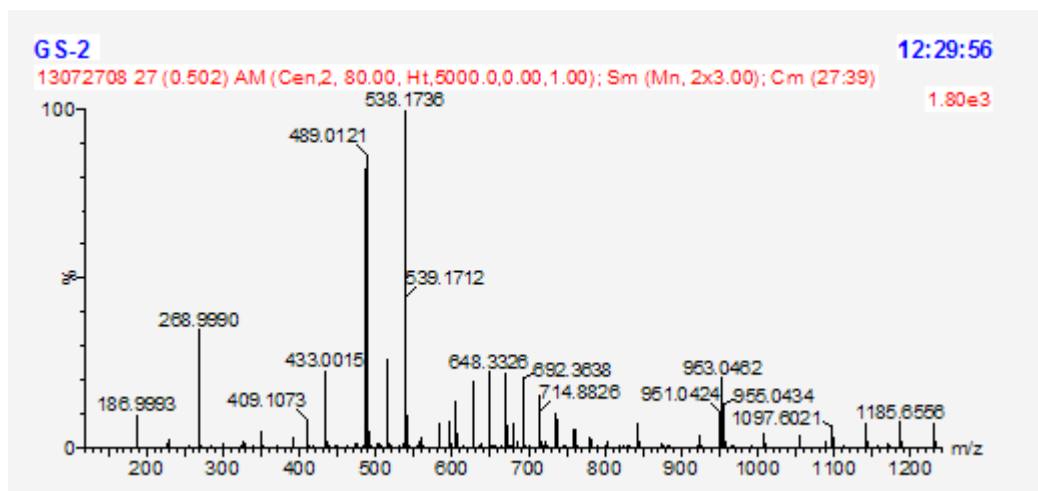

**Fig. S22** TOF HRMS ESI+ of **3b**.

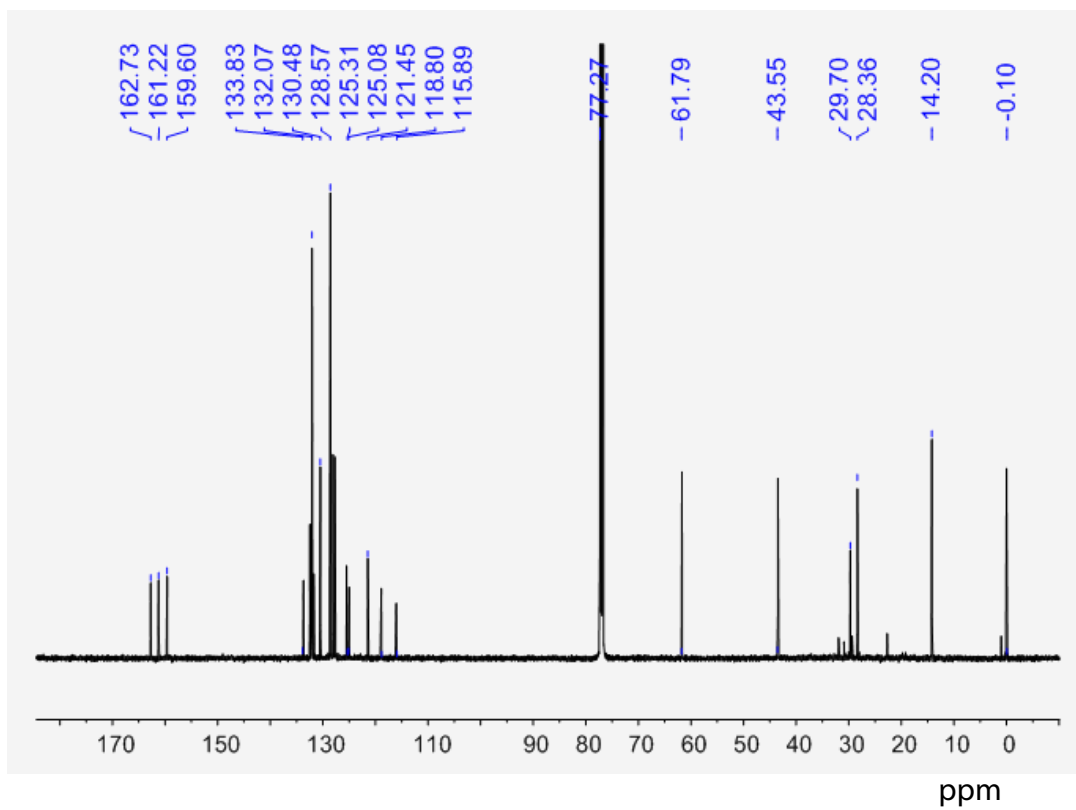

**Fig. S23**  $^{13}\text{C}$  NMR of **3b** (125 MHz. In  $\text{CDCl}_3$ ).

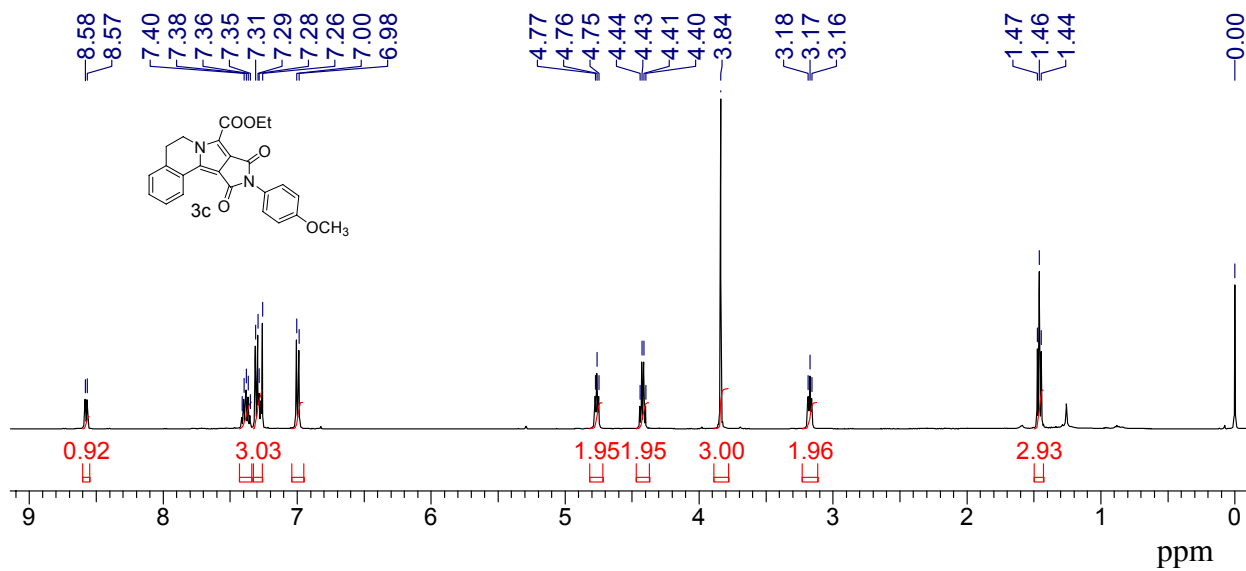

**Fig. S24**  $^1\text{H}$  NMR of **3c** (400 MHz. In  $\text{CDCl}_3$ ).



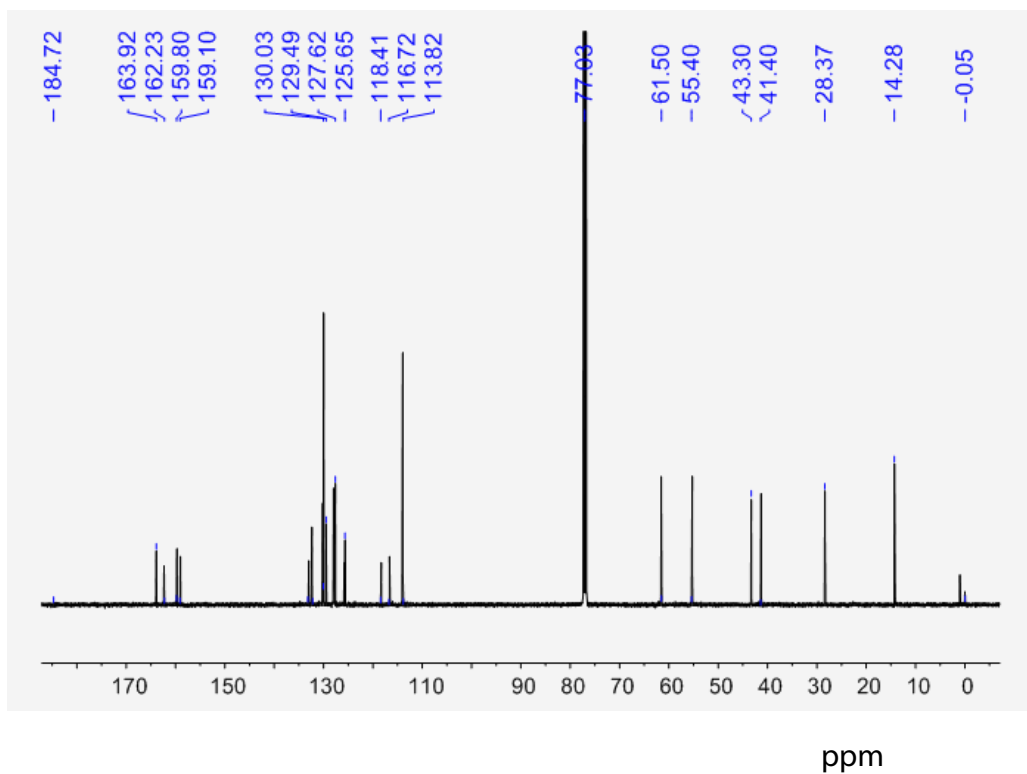

**Fig. S25**  $^{13}\text{C}$  NMR of **3c** (125 MHz. In  $\text{CDCl}_3$ ).

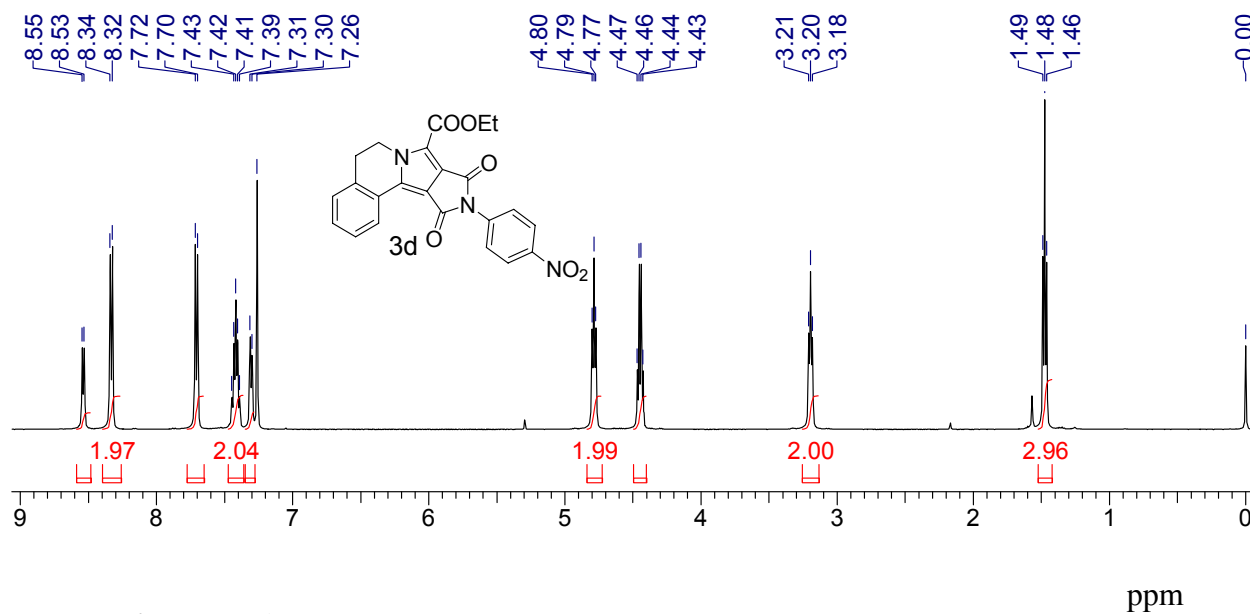

**Fig. S26**  $^1\text{H}$  NMR of **3d** (400 MHz. In  $\text{CDCl}_3$ ).

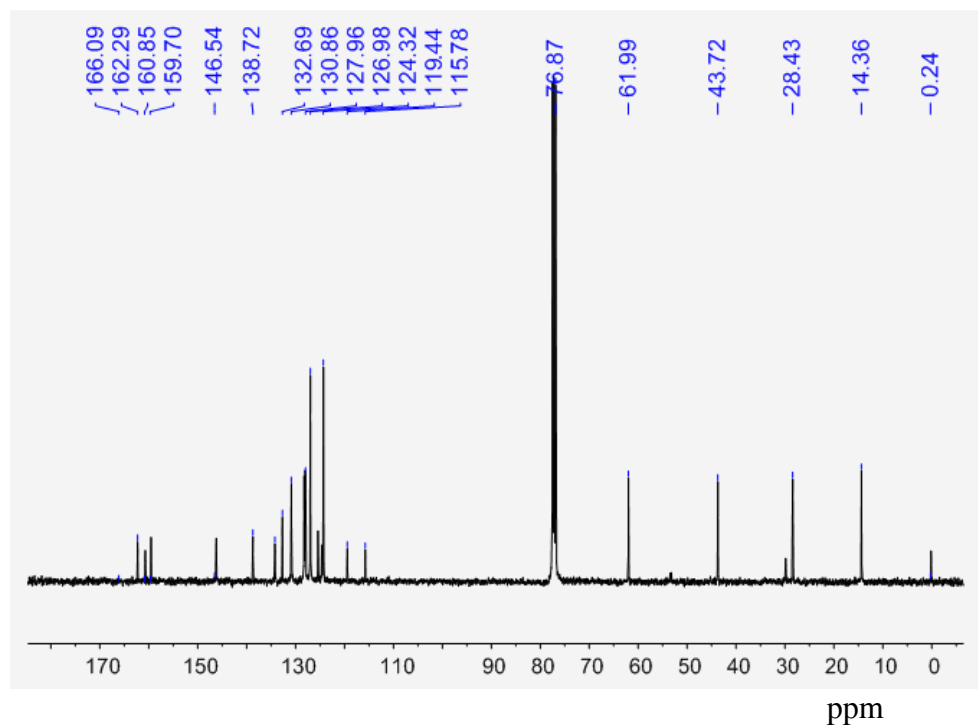

**Fig. S27**  $^{13}\text{C}$  NMR of **3d** (125 MHz. In  $\text{CDCl}_3$ ).

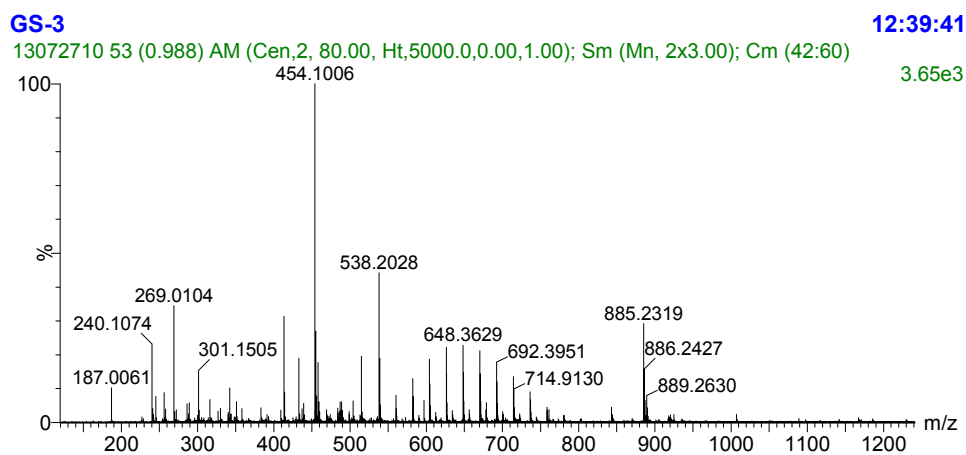

**Fig. S28** TOF HRMS ESI+ of **3d**.

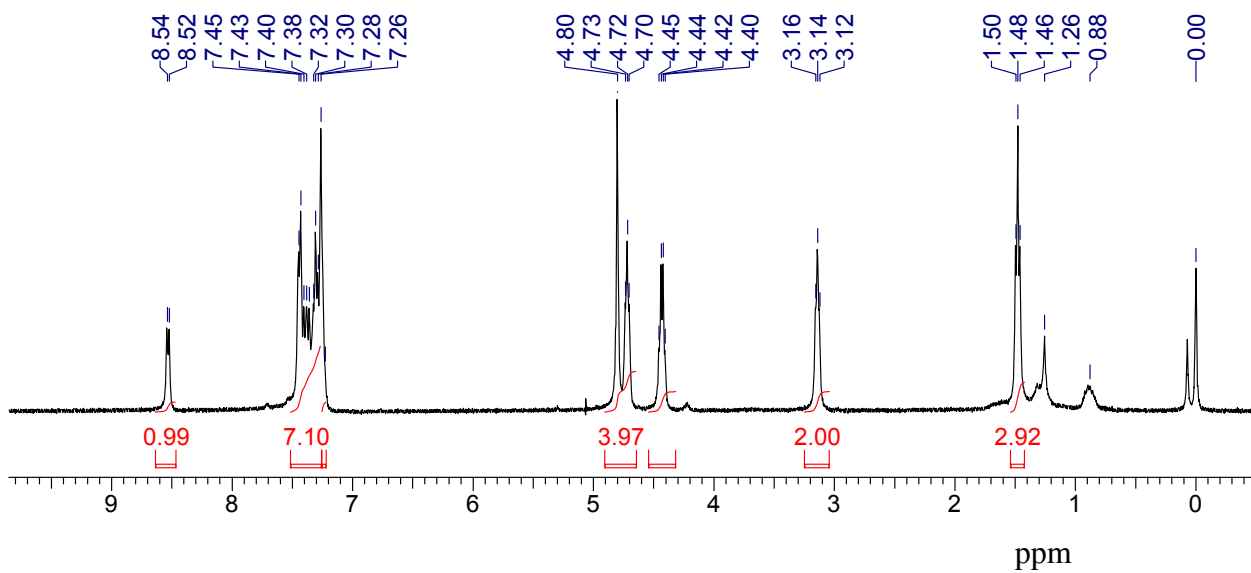

**Fig. S29**  $^1\text{H}$  NMR of **3e** (400 MHz. In  $\text{CDCl}_3$ ).

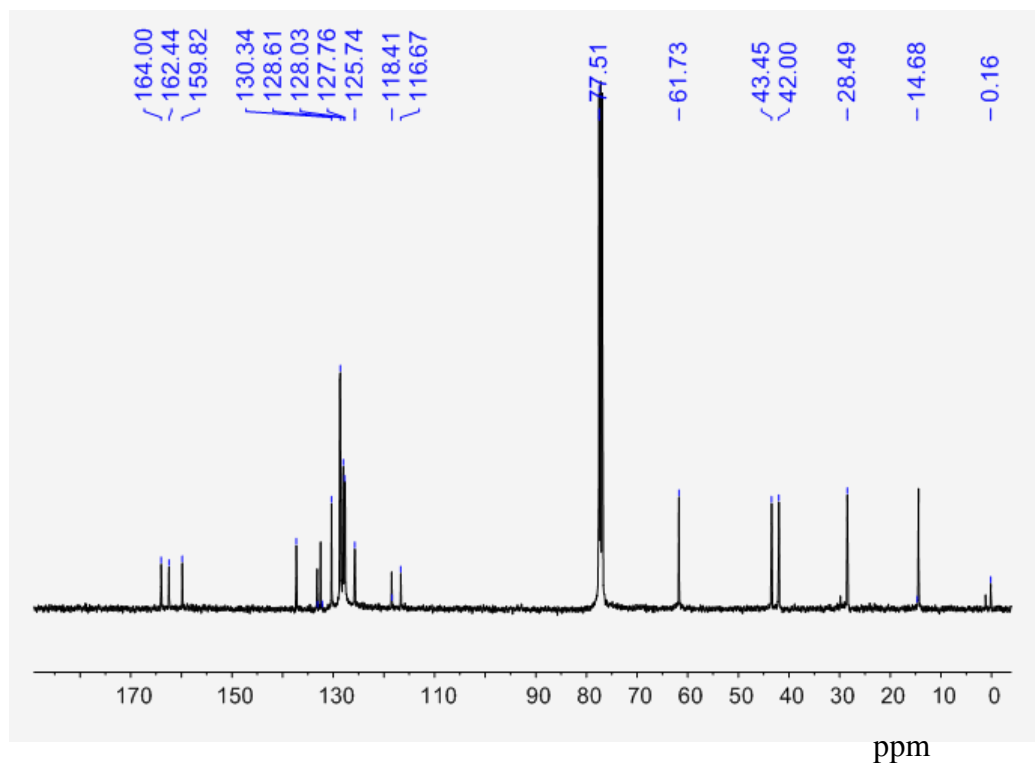

**Fig. S30**  $^{13}\text{C}$  NMR of **3e** (100 MHz. In  $\text{CDCl}_3$ ).

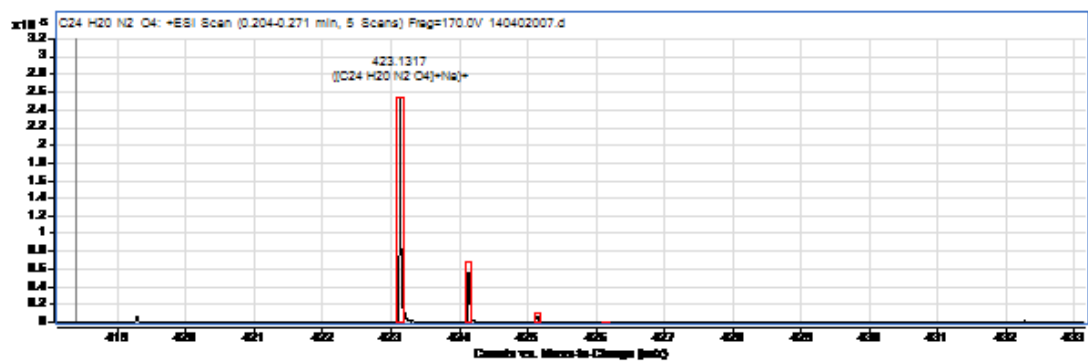

**Fig. S31** TOF HRMS ESI<sup>+</sup> of **3e**.

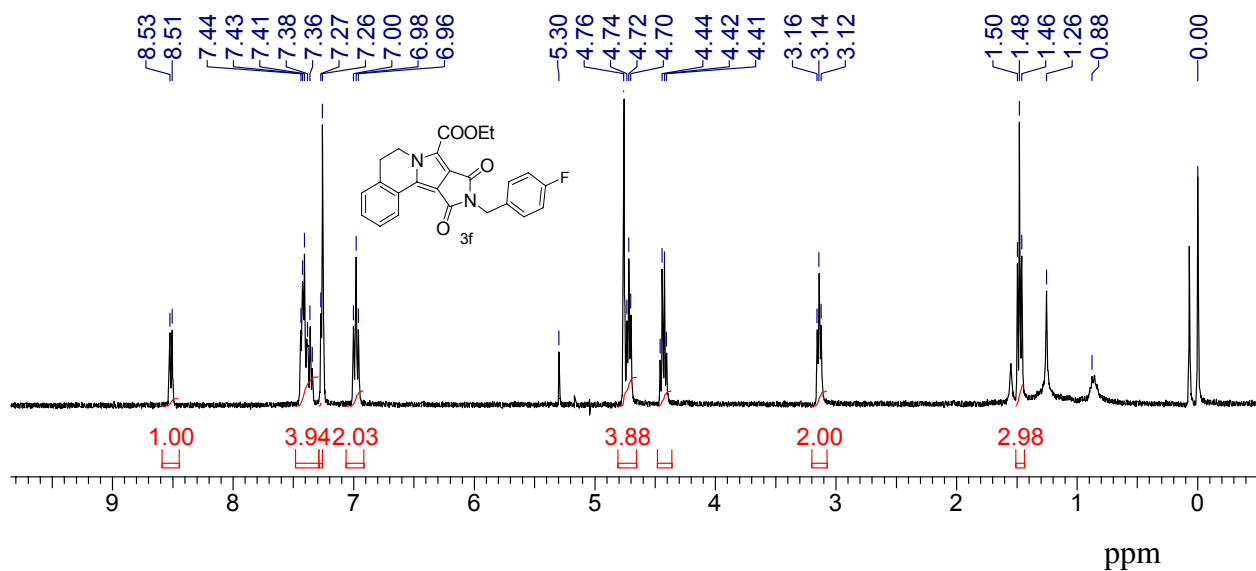

**Fig. S32** <sup>1</sup>H NMR of **3f** (400 MHz. In CDCl<sub>3</sub>).

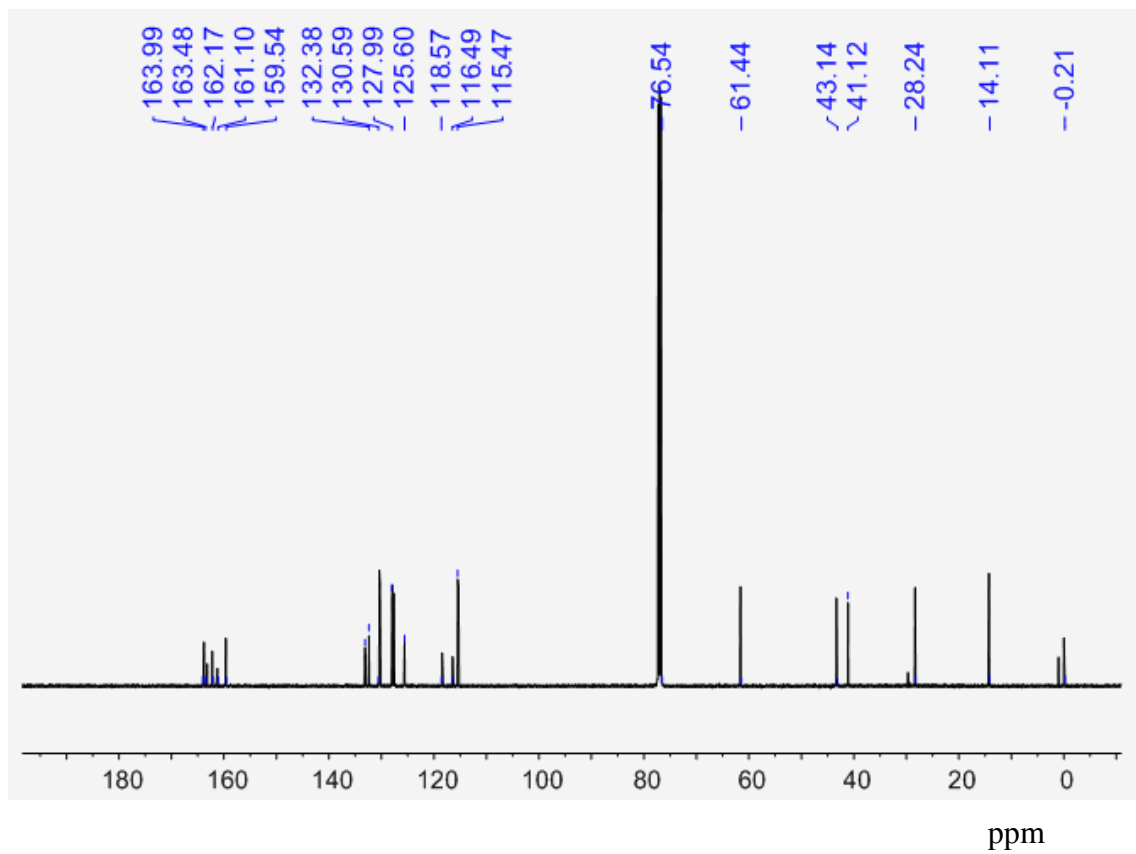

**Fig. S33**  $^{13}\text{C}$  NMR of **3f** (125 MHz. In  $\text{CDCl}_3$ ).

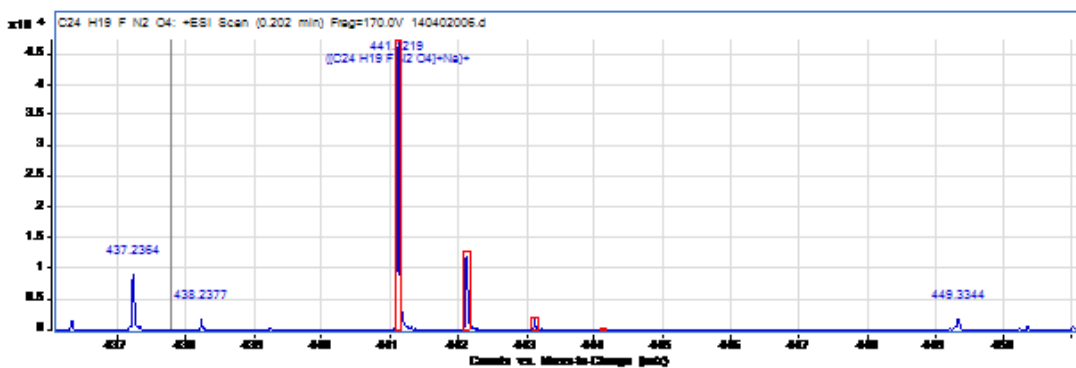

**Fig. S34** TOF HRMS  $\text{ESI}^+$  of **3f**.

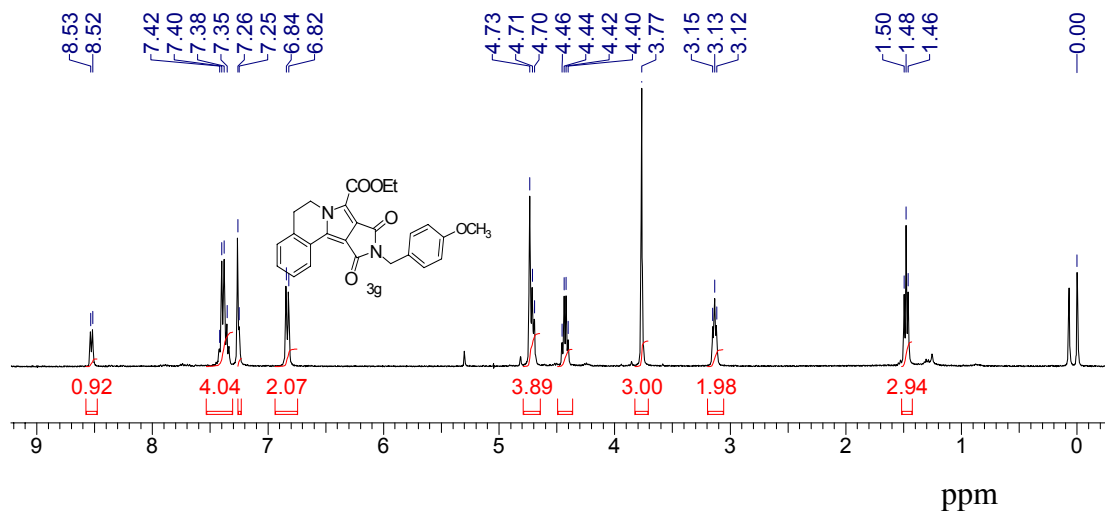

**Fig. S35**  $^1\text{H}$  NMR of **3g** (400 MHz. In  $\text{CDCl}_3$ ).

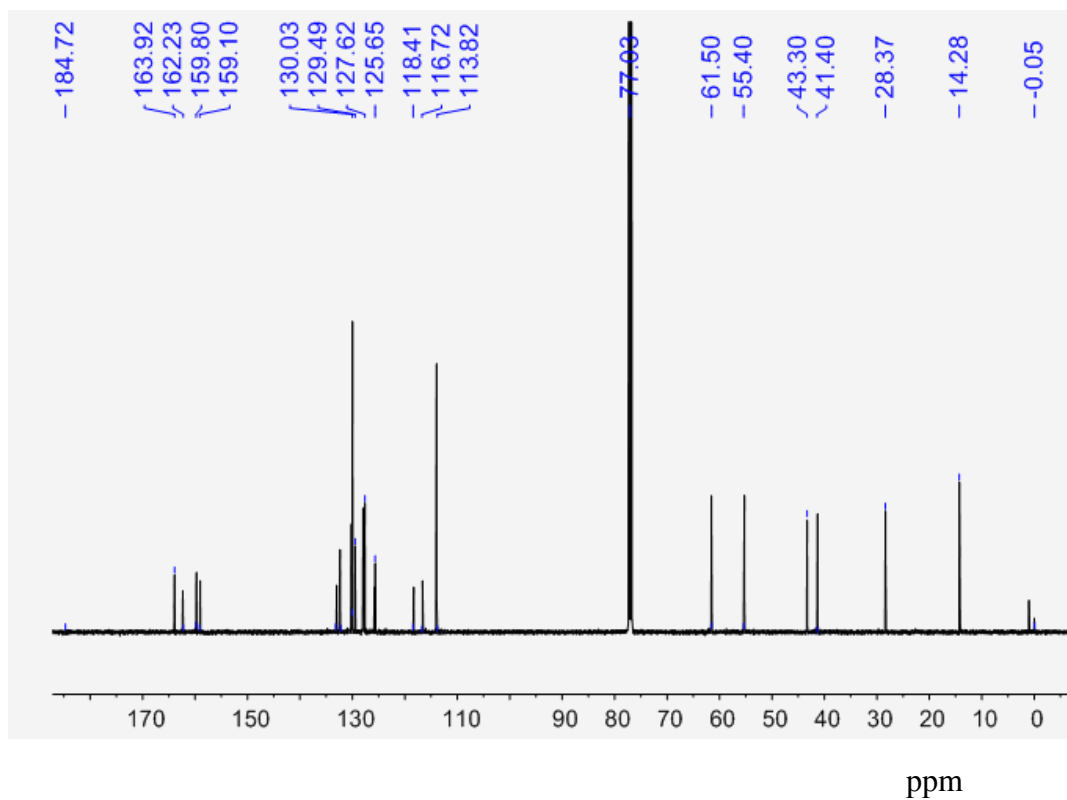

**Fig. S36**  $^{13}\text{C}$  NMR of **3g** (125 MHz. In  $\text{CDCl}_3$ ).

GS

13122508 12 (0.222) AM (Gen,2, 80.00, Ht,5000.0,0.00,1.00); Sm (SG, 2x3.00); Cm (1:41)

11:59:07

2.52e3

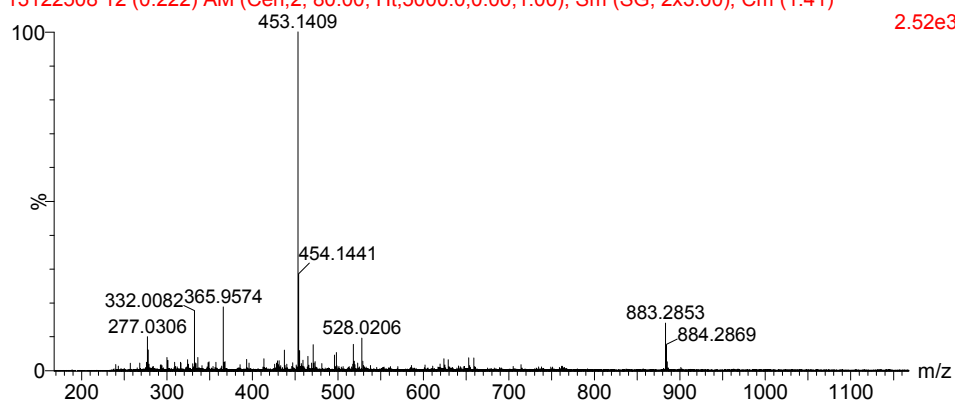

Fig. S37 TOF HRMS ESI<sup>+</sup> of **3g**.

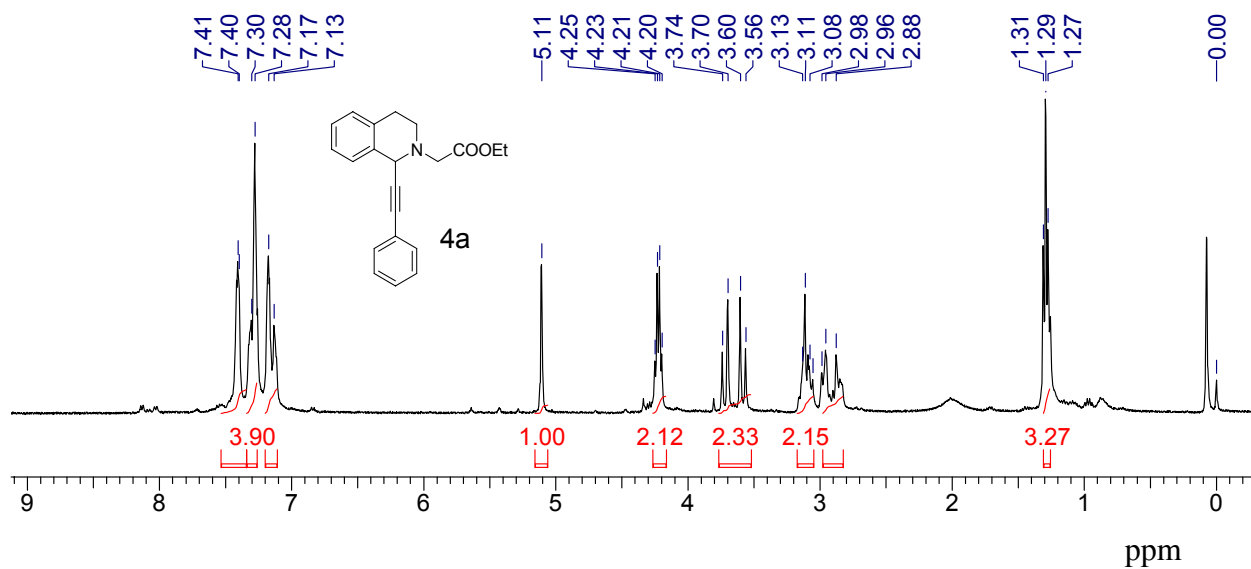

Fig. S38 <sup>1</sup>H NMR of **4a** (400 MHz. In CDCl<sub>3</sub>).

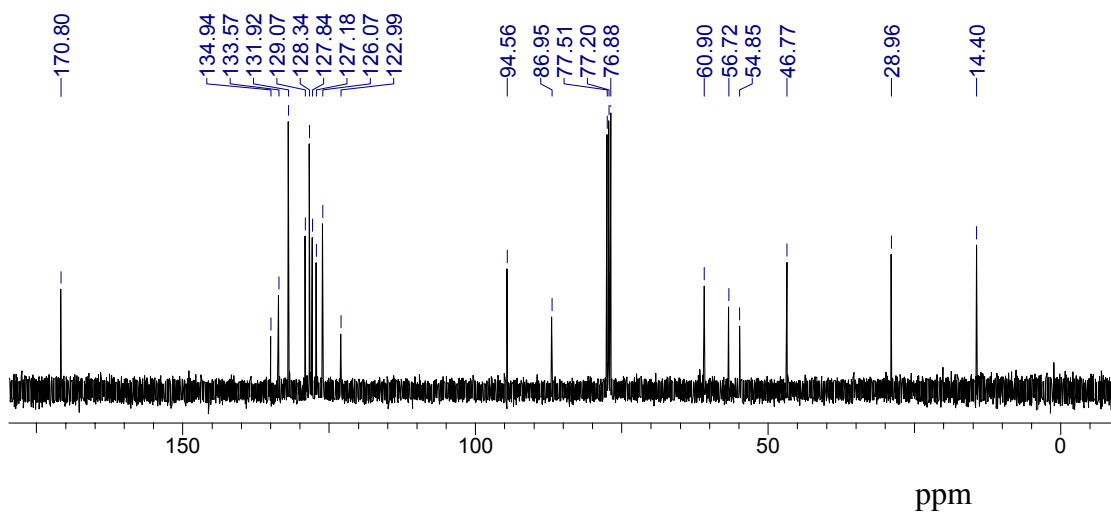

**Fig. S39**  $^{13}\text{C}$  NMR of **4a** (100 MHz. In  $\text{CDCl}_3$ ).

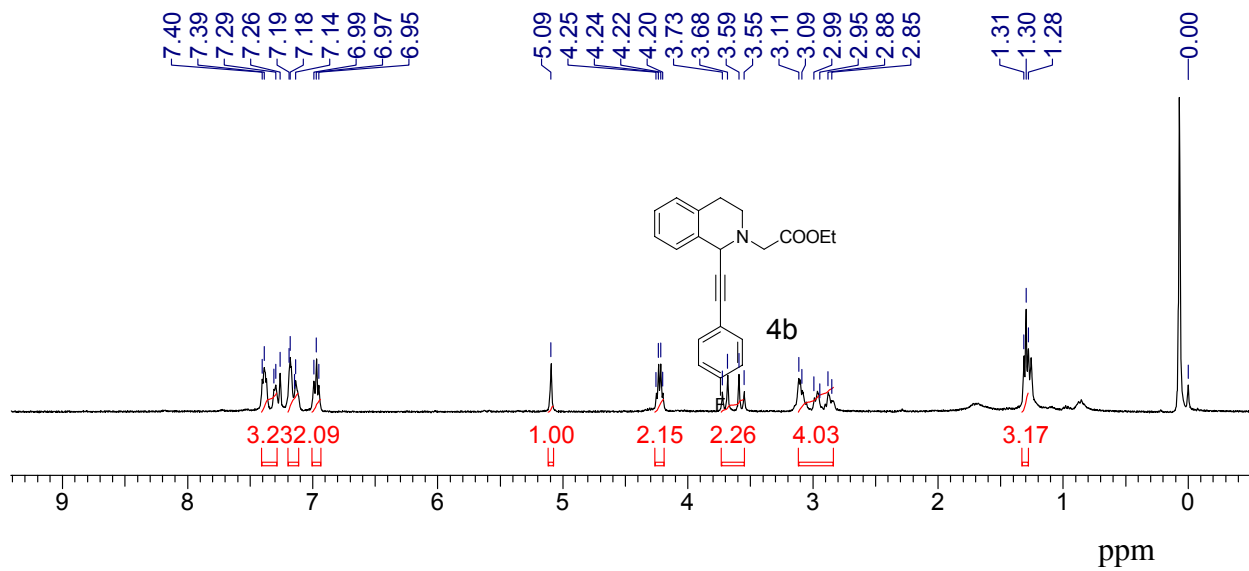

**Fig. S40**  $^1\text{H}$  NMR of **4b** (400 MHz. In  $\text{CDCl}_3$ ).



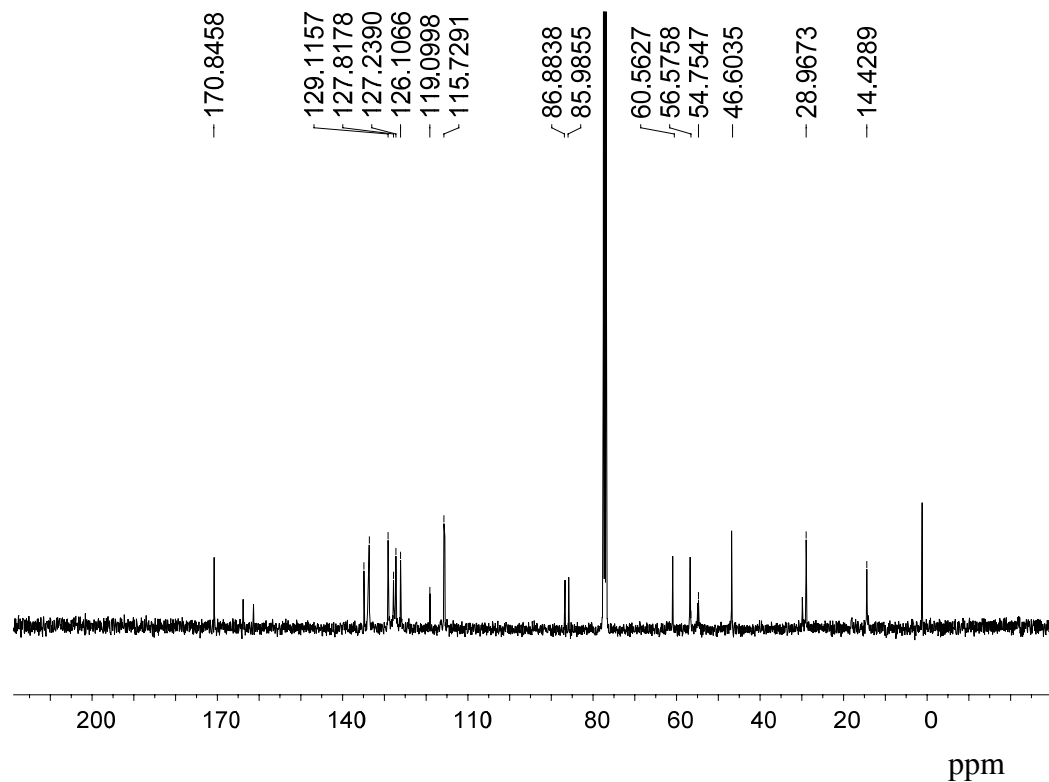

**Fig. S41**  $^{13}\text{C}$  NMR of **4b** (100 MHz. In  $\text{CDCl}_3$ ).

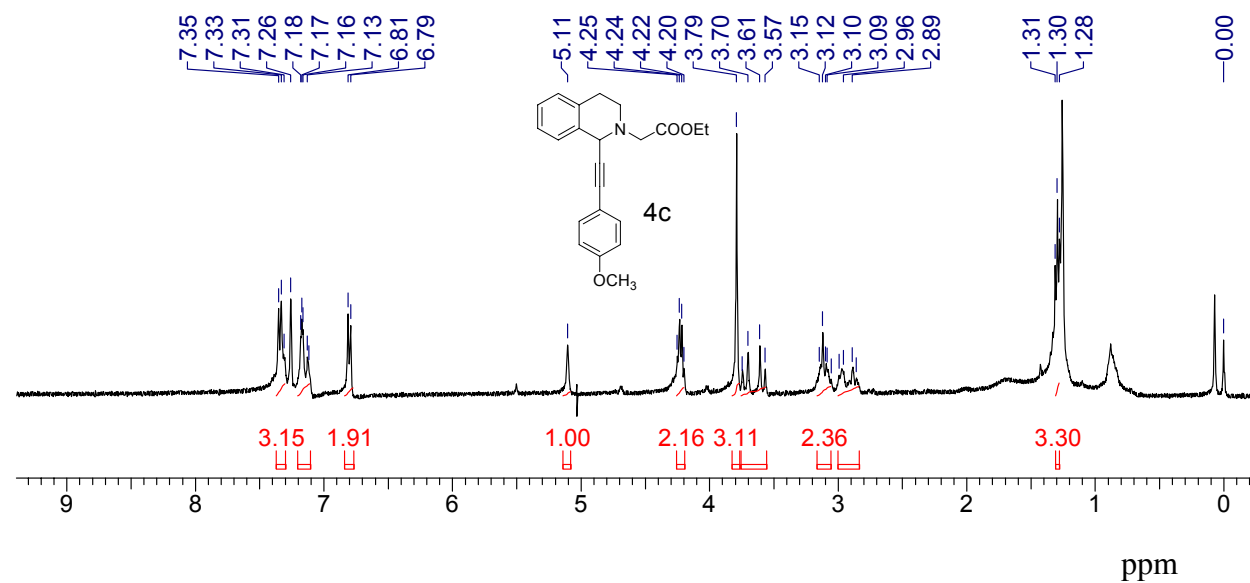

**Fig. S42**  $^1\text{H}$  NMR of **4c** (400 MHz. In  $\text{CDCl}_3$ ).

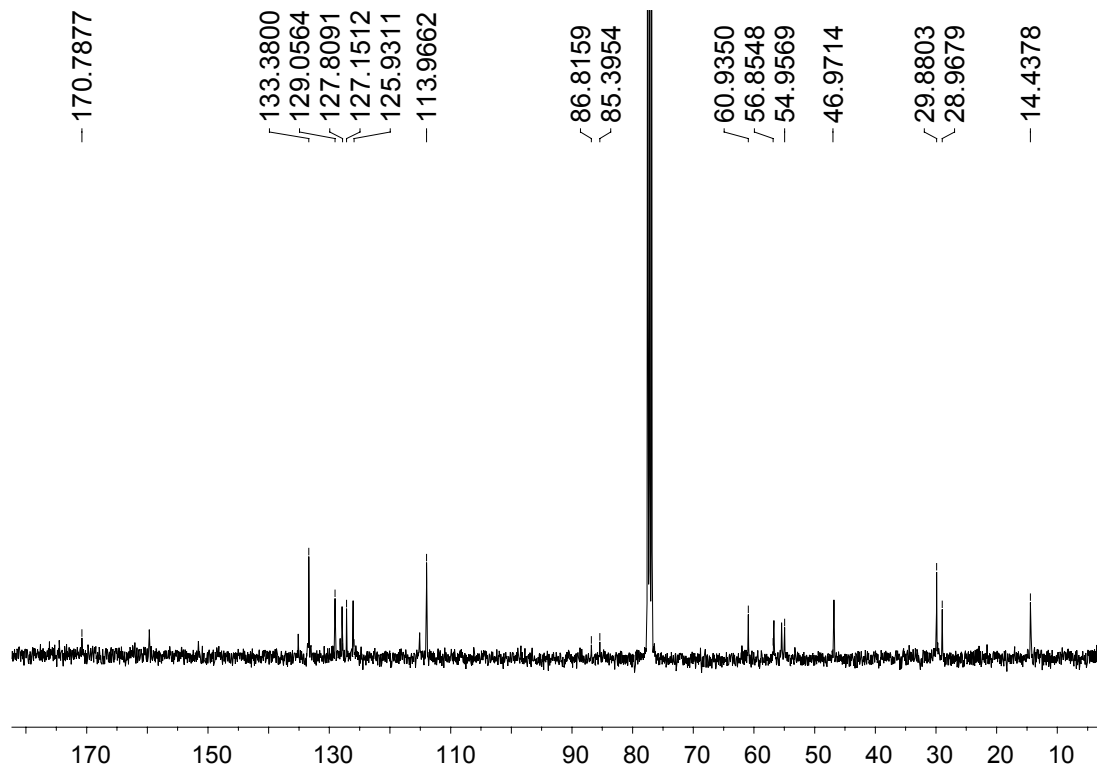

**Fig. S43**  $^{13}\text{C}$  NMR of **4c** (100 MHz. In  $\text{CDCl}_3$ ).

ppm

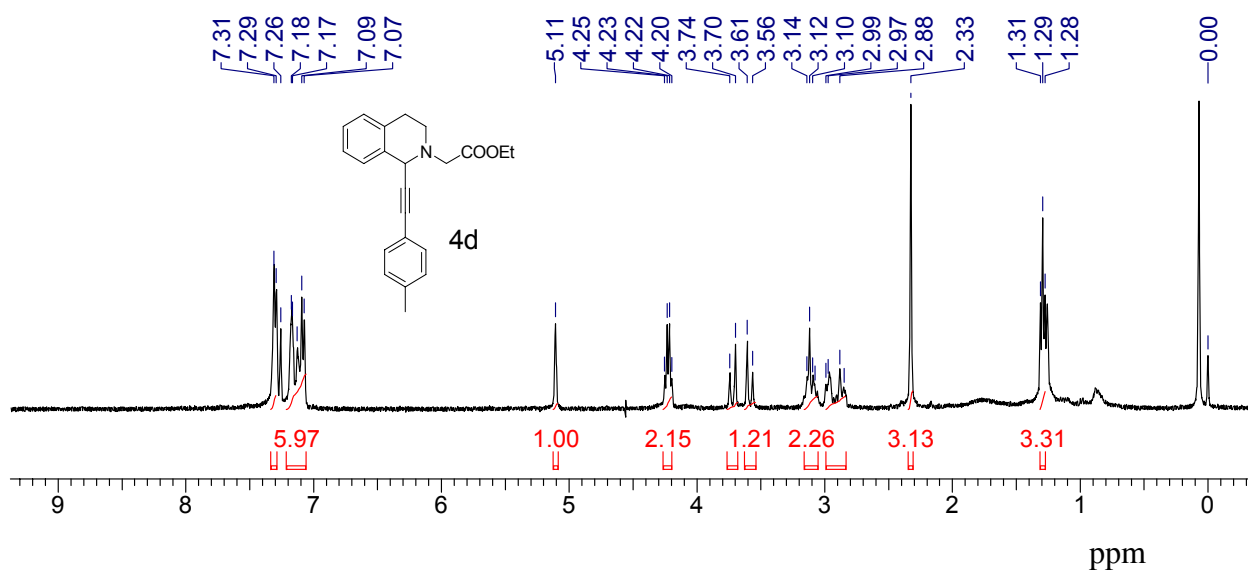

**Fig. S44**  $^1\text{H}$  NMR of **4d** (400 MHz. In  $\text{CDCl}_3$ ).

ppm

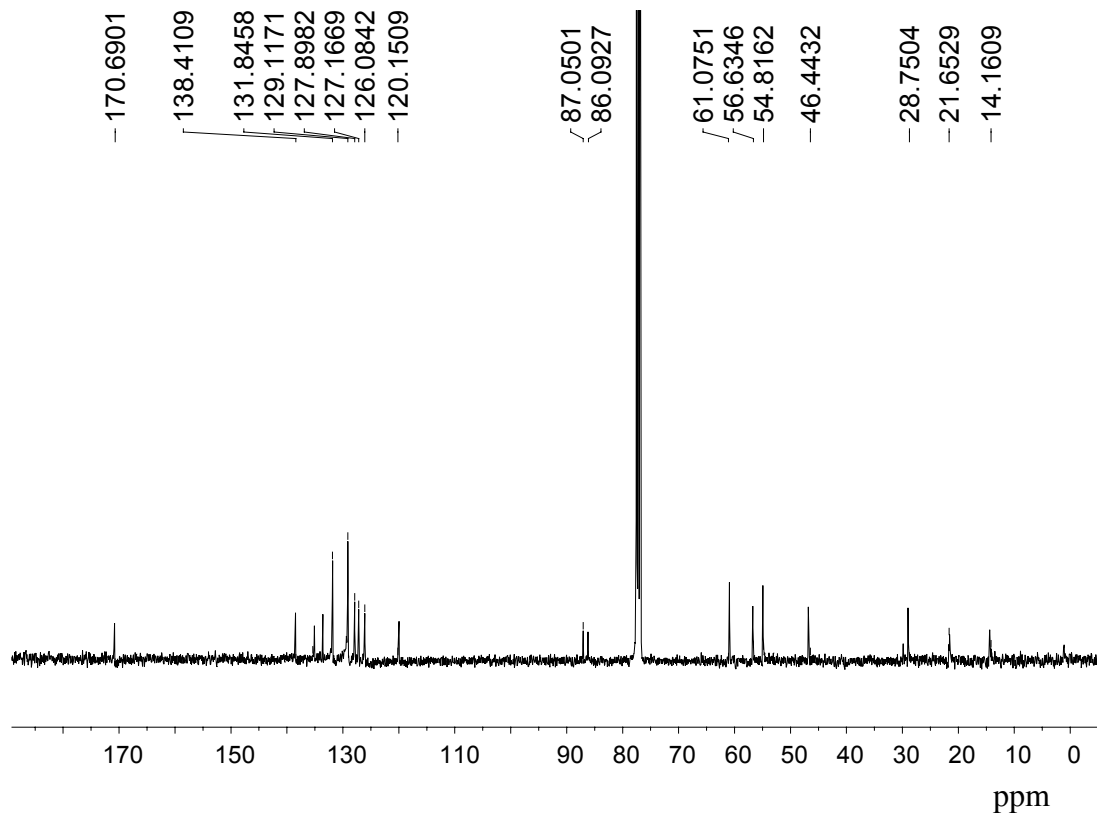

**Fig. S45**  $^{13}\text{C}$  NMR of **4d** (100 MHz. In  $\text{CDCl}_3$ ).

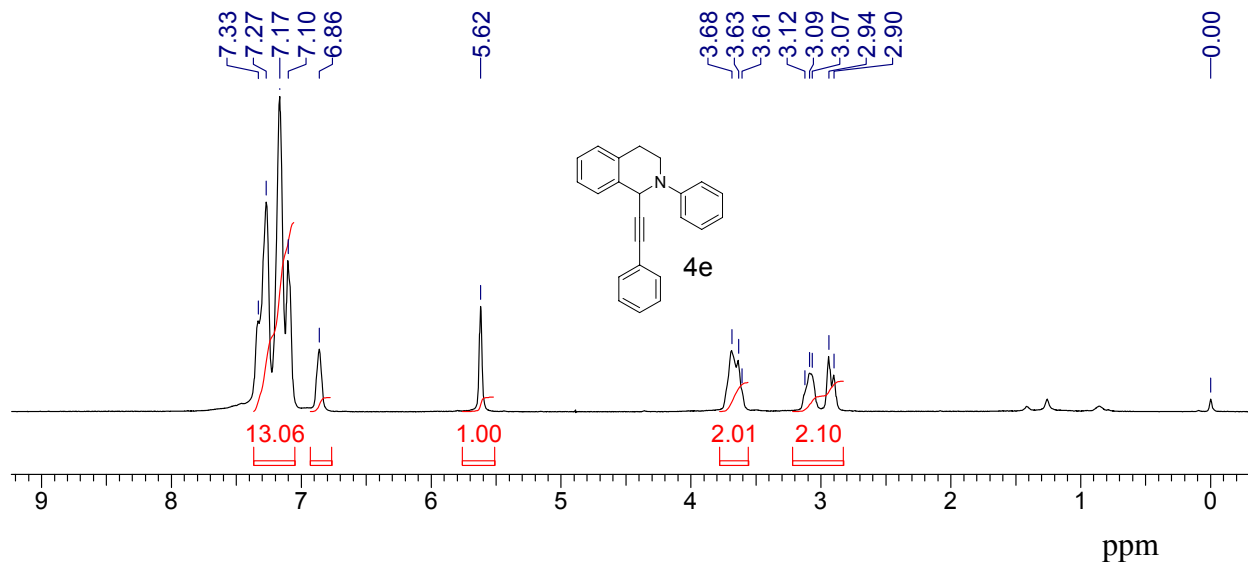

**Fig. S46**  $^1\text{H}$  NMR of **4e** (400 MHz. In  $\text{CDCl}_3$ ).

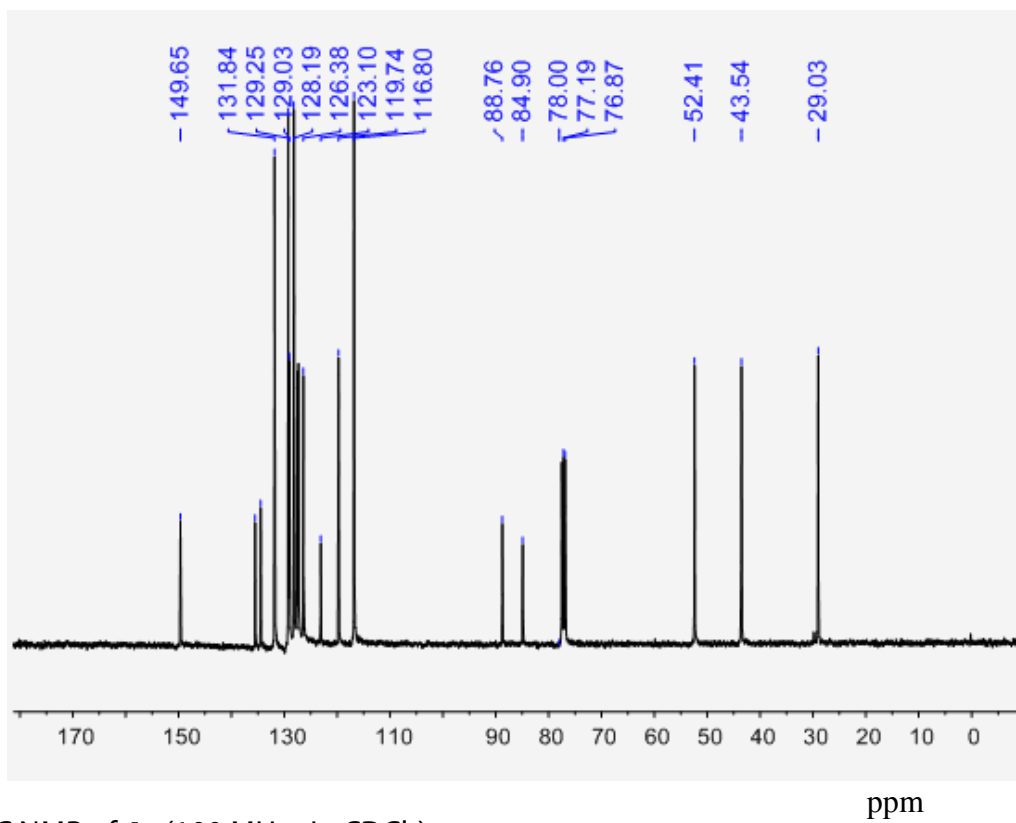

**Fig. S47**  $^{13}\text{C}$  NMR of **4e** (100 MHz. In  $\text{CDCl}_3$ ).

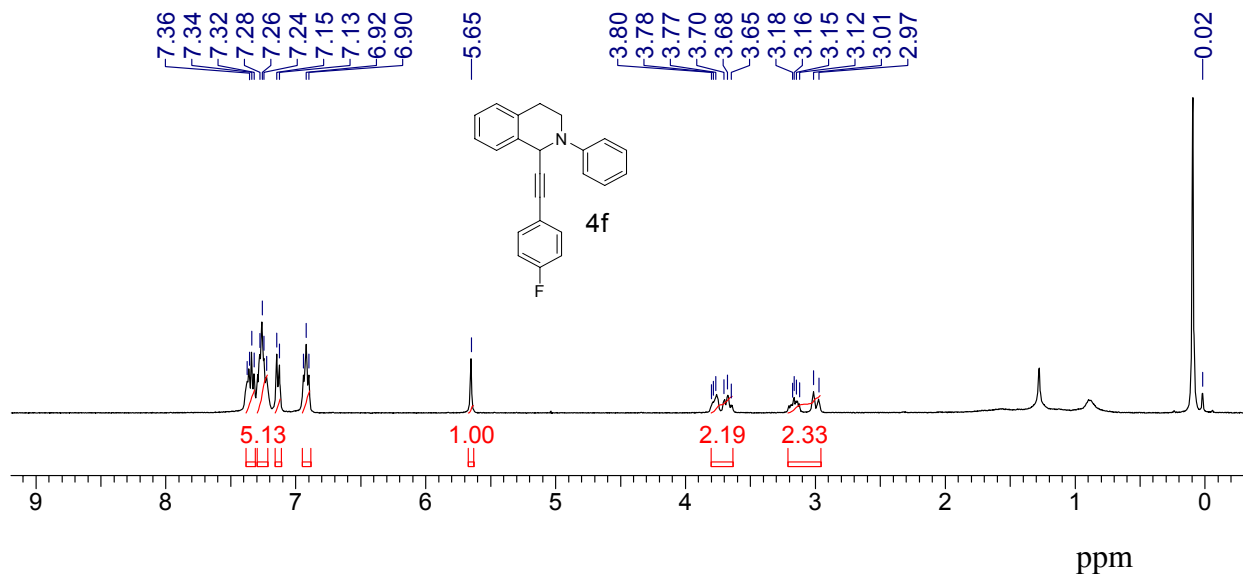

**Fig. S48**  $^1\text{H}$  NMR of **4f** (400 MHz. In  $\text{CDCl}_3$ ).

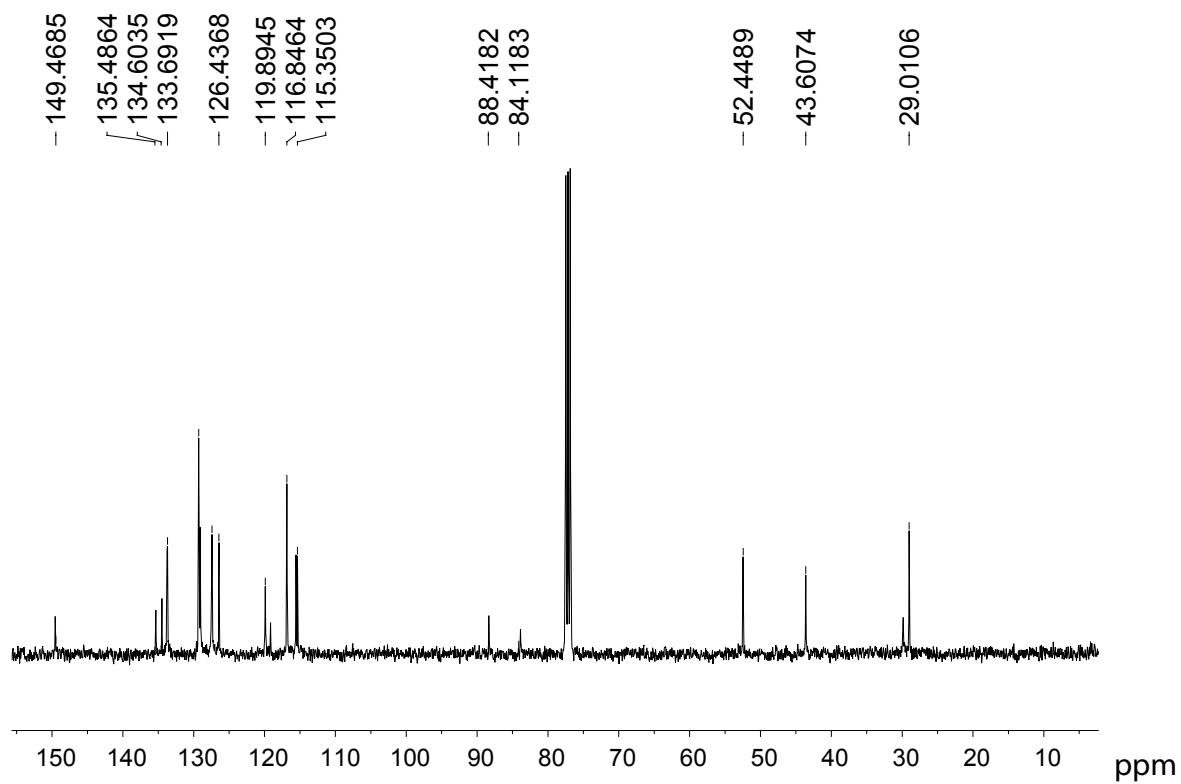

**Fig. S49**  $^{13}\text{C}$  NMR of **4f** (100 MHz. In  $\text{CDCl}_3$ ).

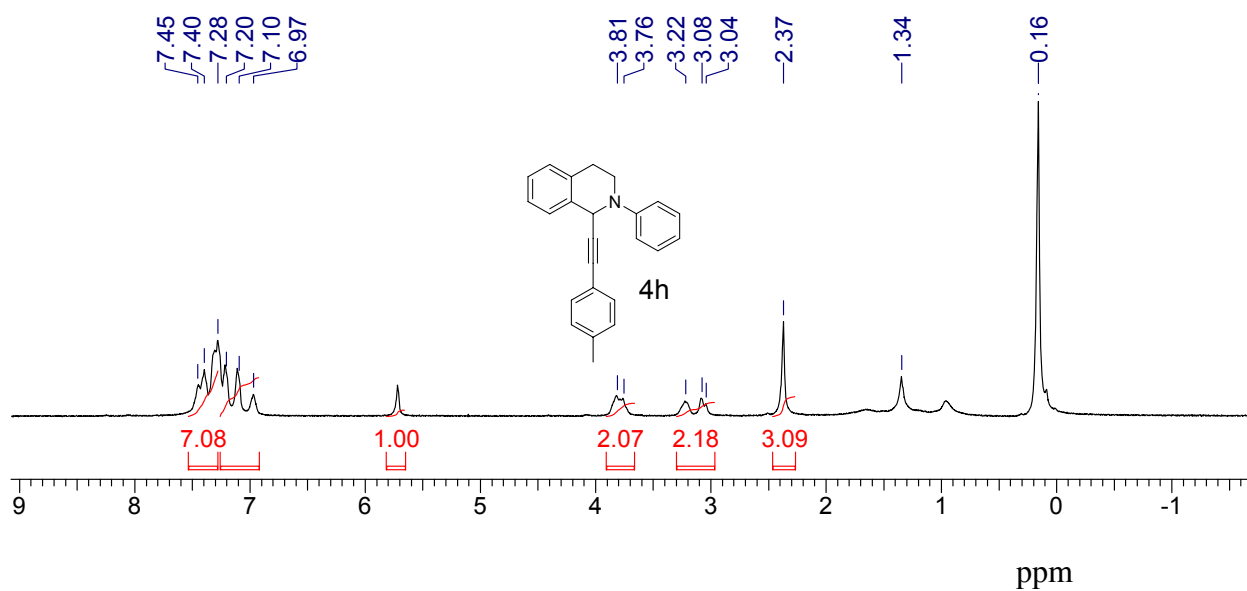

**Fig. S50**  $^1\text{H}$  NMR of **4h** (400 MHz. In  $\text{CDCl}_3$ ).

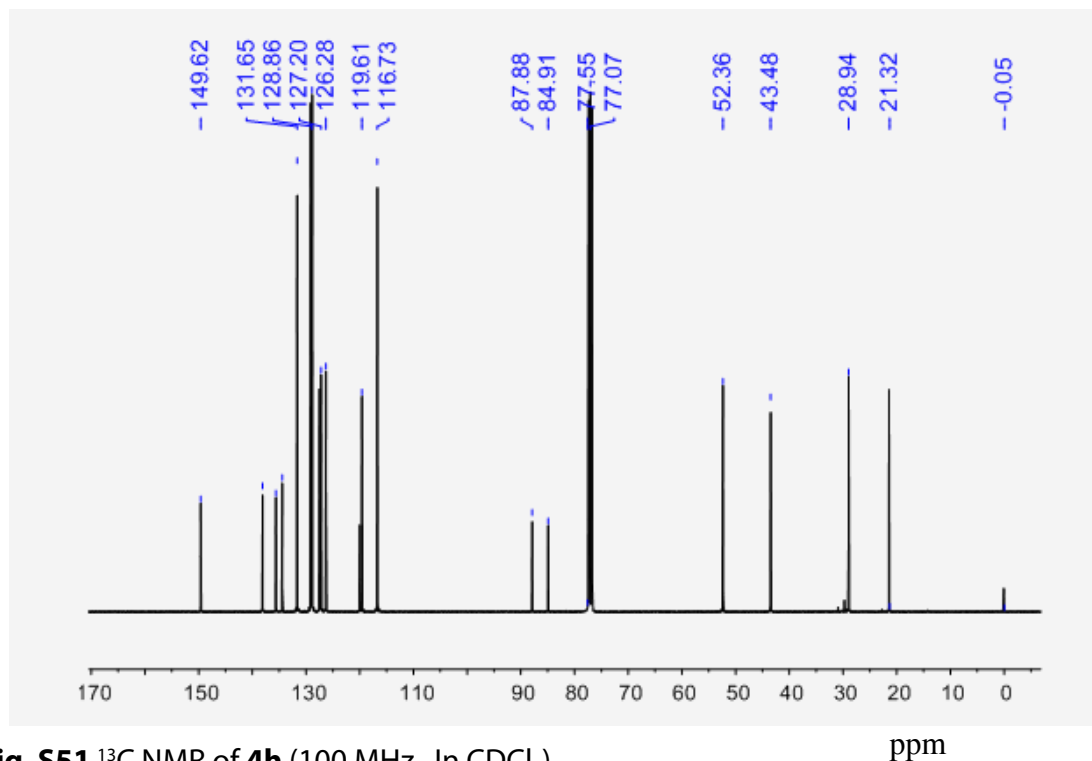

**Fig. S51**  $^{13}\text{C}$  NMR of **4h** (100 MHz. In  $\text{CDCl}_3$ ).

### 3. Photophysical and photochemistry of B-1 and B-2

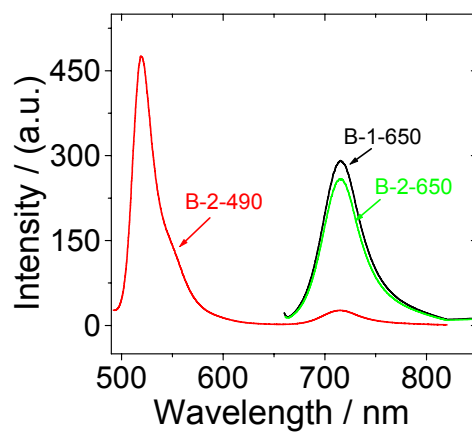

**Fig. S52** The fluorescence spectra of the Bodipy dyads. (a) The emission spectra of **B-1** and **B-2**,  $\lambda_{\text{ex}} = 650 \text{ nm}$ ; B-2,  $\lambda_{\text{ex}} = 490 \text{ nm}$ ;  $c = 1.0 \times 10^{-5} \text{ M}$  in toluene,  $20 \text{ }^\circ\text{C}$ .

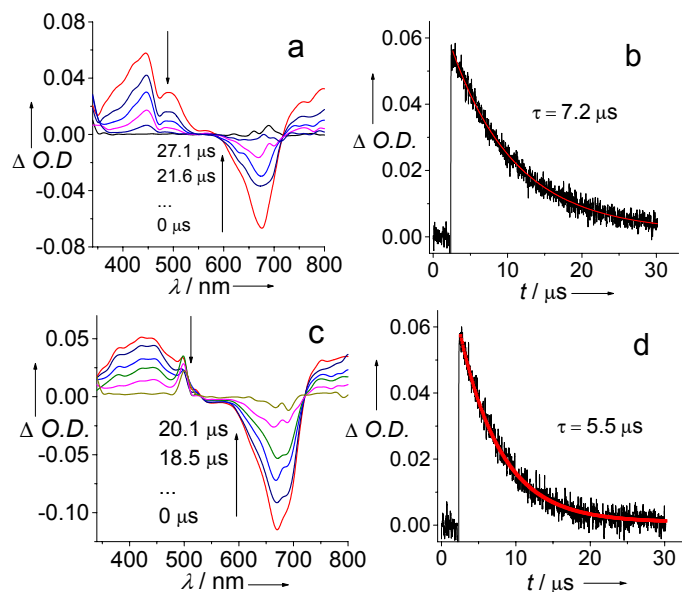

**Fig. 53** Nanosecond time-resolved transient difference absorption spectra of (a) **B-1** and (c) **B-2**. The decay curves are (b) **B-1** at 430 nm and (d) **B-2** at 430 nm, respectively. After pulsed excitation at 355 nm (deaerated toluene,  $2.0 \times 10^{-5}$  M, 20 °C).

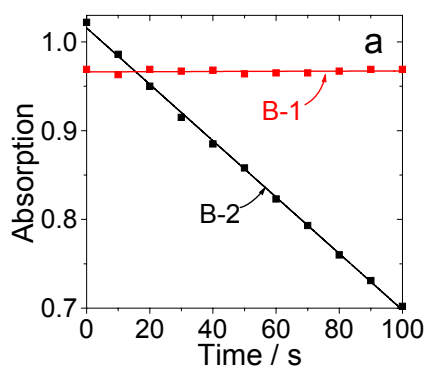

**Fig. S54** Comparative singlet oxygen generation experiment. Absorbance decrease of DPBF with time in the presence of photosensitizers: **B-1** and **B-2**. The samples were irradiated with monochromatic light from spectrofluorometer ( $\lambda_{\text{ex}} = 501 \text{ nm}$ );  $c$  [sensitizers] =  $5.0 \times 10^{-4}$  M. 20 °C.

#### 4. Mechanism of the photocatalytic reaction

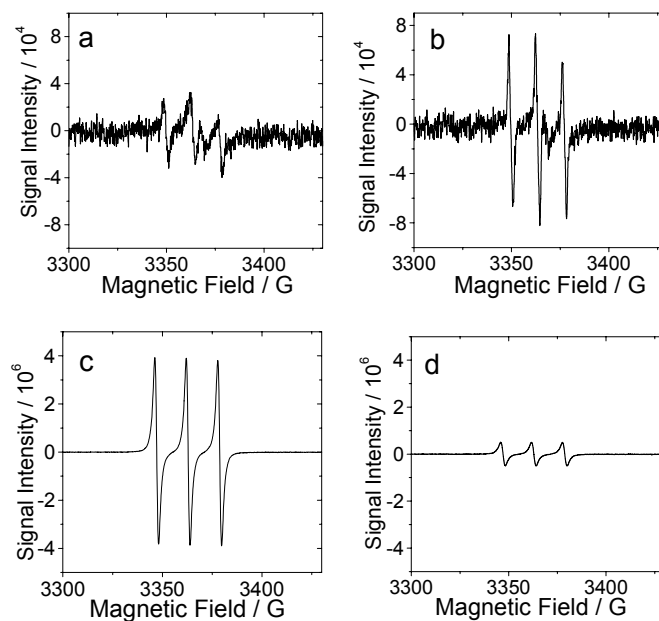

**Fig. S55** (a) ESR spectrum of the mixture **B-1** ( $4.0 \times 10^{-4}$  M) and DMPO ( $2.0 \times 10^{-2}$  M); (b) ESR spectrum of the mixture **B-1** ( $4.0 \times 10^{-4}$  M), **1a** ( $5.0 \times 10^{-2}$  M) and DMPO ( $2.0 \times 10^{-2}$  M); (c) **B-1** ( $4.0 \times 10^{-4}$  M), TEMP (0.10M); (d) **B-1** ( $4.0 \times 10^{-4}$  M), TEMP (0.10 M), **1a** ( $5.0 \times 10^{-2}$  M). In air saturated  $\text{CH}_3\text{CN}$ . All the irradiations were performed with 635 nm continuous laser and the duration is 120 s ( $210 \text{ mW/cm}^2$ ).  $22^\circ\text{C}$ .

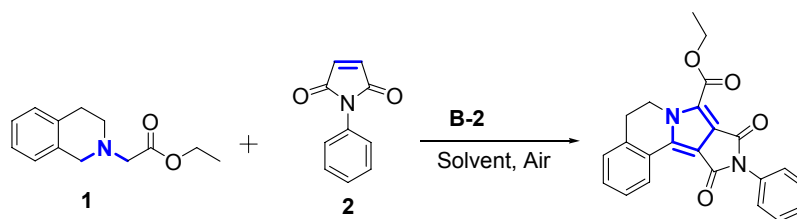



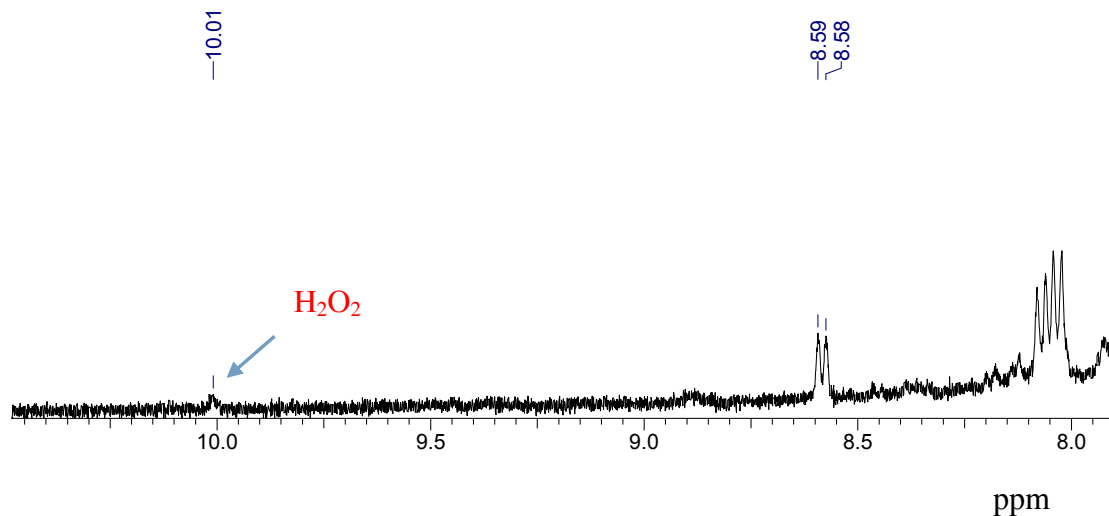

**Fig. S56**  $^1\text{H}$  NMR of reaction solution after 1.5 h irradiation, **B-2**(1mmol%), 300mW/m<sup>2</sup>, in  $\text{CH}_2\text{Cl}_2$ ,  $\text{CDCl}_3$  (400 MHz). **1** (0.15 mmol), **2a** (0.10 mmol), **B-2**(1mol%) were mixed in dichloromethane (5.0 mL), the mixture was irradiated with 35 W Xe lamp ( $\lambda > 385$  nm), R.T.

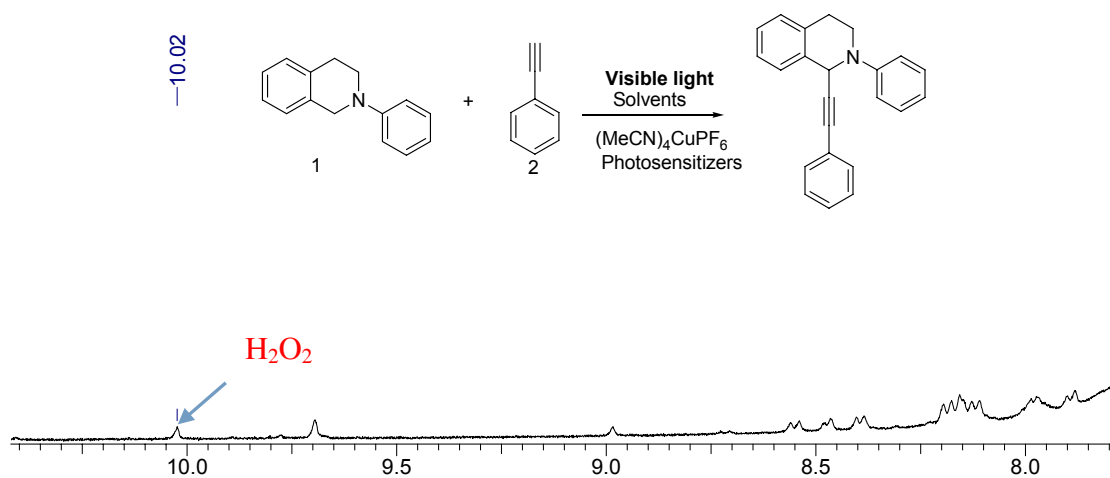

**Fig. S57**  $^1\text{H}$  NMR of reaction solution after 3 h irradiation, **B-2**(1mmol%), 300mW/m<sup>2</sup>, in  $\text{CH}_3\text{CN}$ ,  $\text{CDCl}_3$  (400 MHz). **1** (0.10 mmol), **2** (0.80 mmol),  $(\text{MeCN})_4\text{CuPF}_6$  (10 mol%), **B-2** (1mol%) were mixed in  $\text{CH}_3\text{CN}$  (2.0 mL), the mixture was irradiated with 35 W Xe lamp ( $\lambda > 385$  nm), R.T.

**Scheme S1.** Proposed Mechanism of the Photoredox catalysis and metal catalysis sequence with the Organic Photocatalysts **B-2**.

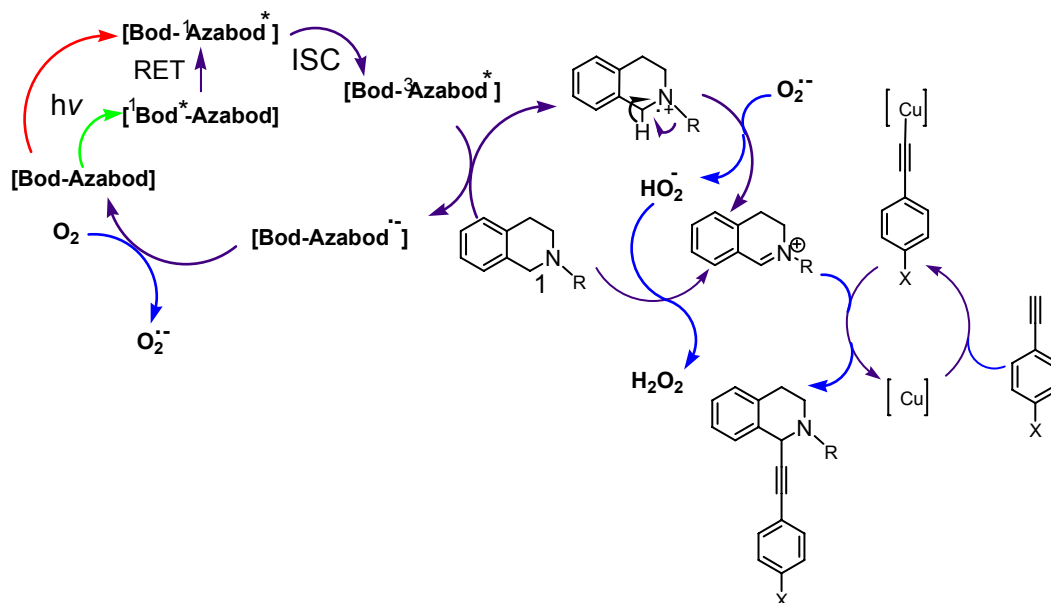

## 5. Spectrum of the Xenon lamp and the UV-Vis absorption spectrum of the photocatalyst

Comparison of the radiance spectrum of the Xenon lamp used in the photocatalysis and the UV-Vis absorption spectrum of the photocatalyst

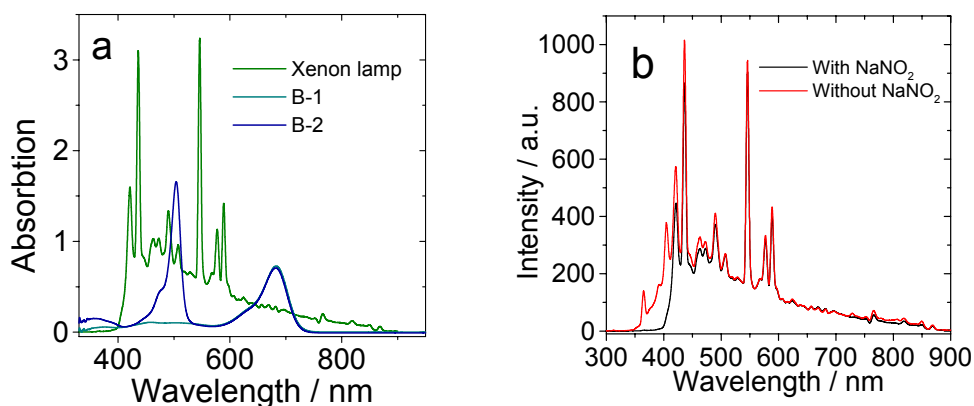

**Fig. S58** (a) Comparison of the UV-Vis absorption spectra of **B-1**, **B-2** and the emission spectra of the 35 W xenon lamp (measured with spectrofluorometer). In  $\text{CH}_2\text{Cl}_2$ ,  $1.0 \times 10^{-5}$  M,  $20^\circ\text{C}$ . The excitation of xenon lamp with wavelength shorter than 387 nm was blocked by 0.72 M  $\text{NaNO}_2$  solution. (b) The emission spectrum of the 35 W xenon lamp with and without the  $\text{NaNO}_2$  solution filter. Xe lamp parameter: 35 W, 8000 K.

**6. Yields of the aerobic oxidation [3+2] cycloaddition photoreactions with B-1 and B-2 as photocatalysts, upon Xe lamp excitation with Band-Pass Filters (450 nm-520 nm) <sup>a</sup>**

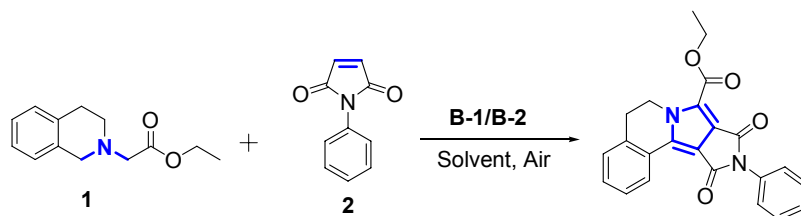

<sup>a</sup> Reaction conditions: **1** (0.15 mmol, 26 mg), **2** (0.1 mmol, 17.3 mg), **B-1/B-2** (1mmol%) and NBS (1.2 equiv) were mixed in CH<sub>2</sub>Cl<sub>2</sub> (5.0 mL), the mixture was irradiated 2.0 h, 29 °C. Yield: with **B-1**: 41%, with **B-2**: 46%.

**7. Sun light promoted aerobic oxidation [3+2] cycloaddition <sup>a</sup>**

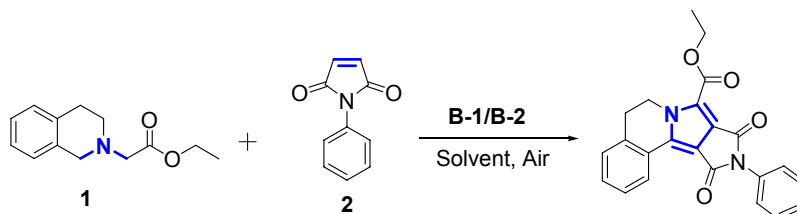

<sup>a</sup>Reaction conditions: **1** (0.15 mmol, 26 mg), **2** (0.1 mmol, 17.3mg), **B-1/B-2** (1mmol%) and NBS (1.2 equiv) were mixed in CH<sub>2</sub>Cl<sub>2</sub> (5.0 mL), the mixture was irradiated 1.5 h with solar light (270W/m<sup>2</sup>~330W/m<sup>2</sup>), 29°C. Yield: B-1:70%, B-2:78%. East longitude:121.536°, Northern latitude: 38.866°, 9:30 a.m.

## 8. Diiodo-Bodipy as photocatalysts, upon Xe lamp excitation for aerobic oxidation [3+2] cycloaddition <sup>a</sup>

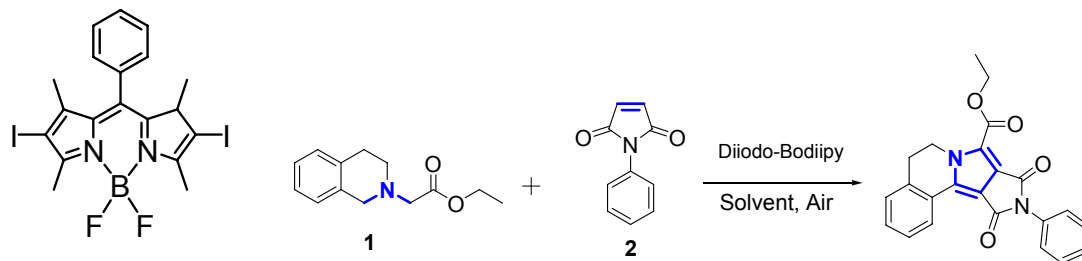

<sup>a</sup> Reaction conditions: **1** (0.15 mmol, 26 mg), **2** (0.1 mmol, 17.3mg), **Diiodo-Bodipy** (1mmol%) and NBS (1.2 equiv) were mixed in CH<sub>2</sub>Cl<sub>2</sub> (5.0 mL), the mixture was irradiated 1.5 h, 29 °C. Yield: 79%.

## 9. B-2 as photocatalysts for reproducing of a previous work <sup>a</sup>

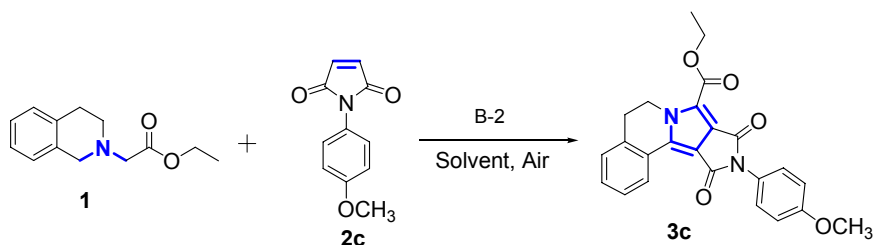

<sup>a</sup> Reaction conditions: **1** (0.15 mmol, 26 mg), **2c** (0.1 mmol, 20.3 mg), **B-2** (1mmol%) and NBS (1.2 equiv) were mixed in CH<sub>2</sub>Cl<sub>2</sub> (5.0 mL), the mixture was irradiated 1.5 h, 29 °C. Yield: 72 %.

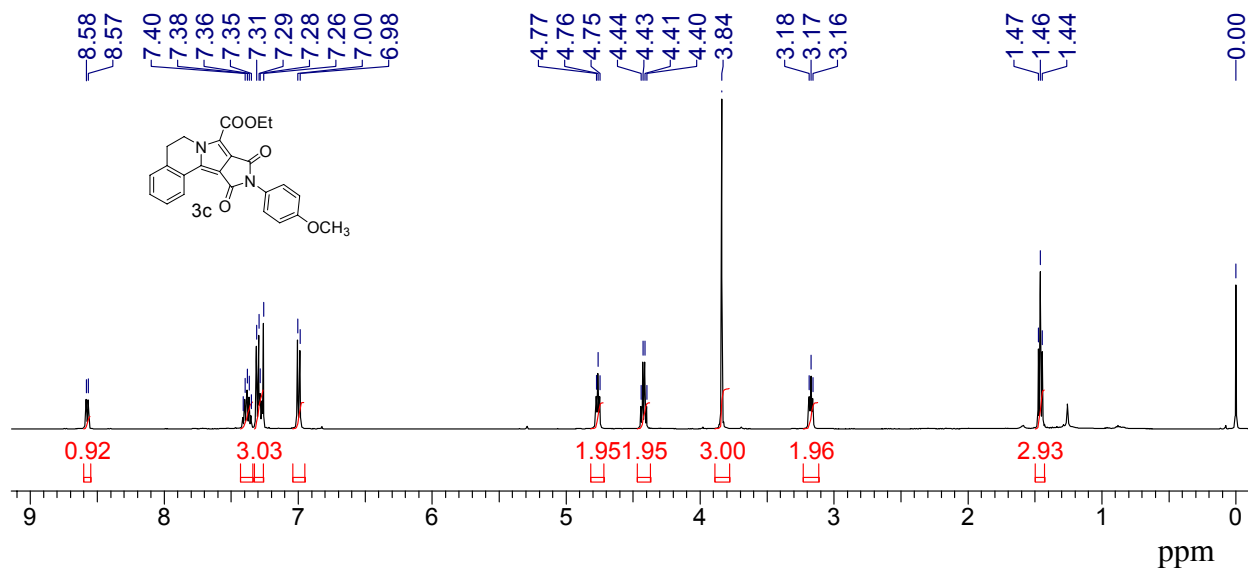

**Fig. S59**  $^1\text{H}$ NMR of **3c**. Reaction conditions: **1** (0.15 mmol, 26 mg), **2c** (0.1 mmol, 20.3 mg), **B-2** (1mmol%) and NBS (1.2 equiv) were mixed in  $\text{CH}_2\text{Cl}_2$  (5.0 mL), the mixture was irradiated 1.5 h.

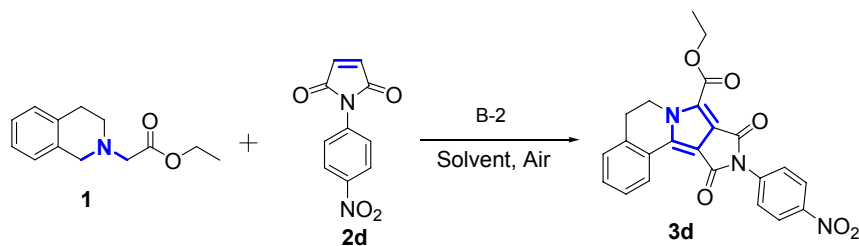

<sup>a</sup> Reaction conditions: **1** (0.15 mmol, 26 mg), **2d** (0.1 mmol, 21.8 mg), **B-2** (1mmol%) and NBS (1.2 equiv) were mixed in  $\text{CH}_2\text{Cl}_2$  (5.0 mL), the mixture was irradiated 1.5 h, 29 °C. Yield: 78 %.

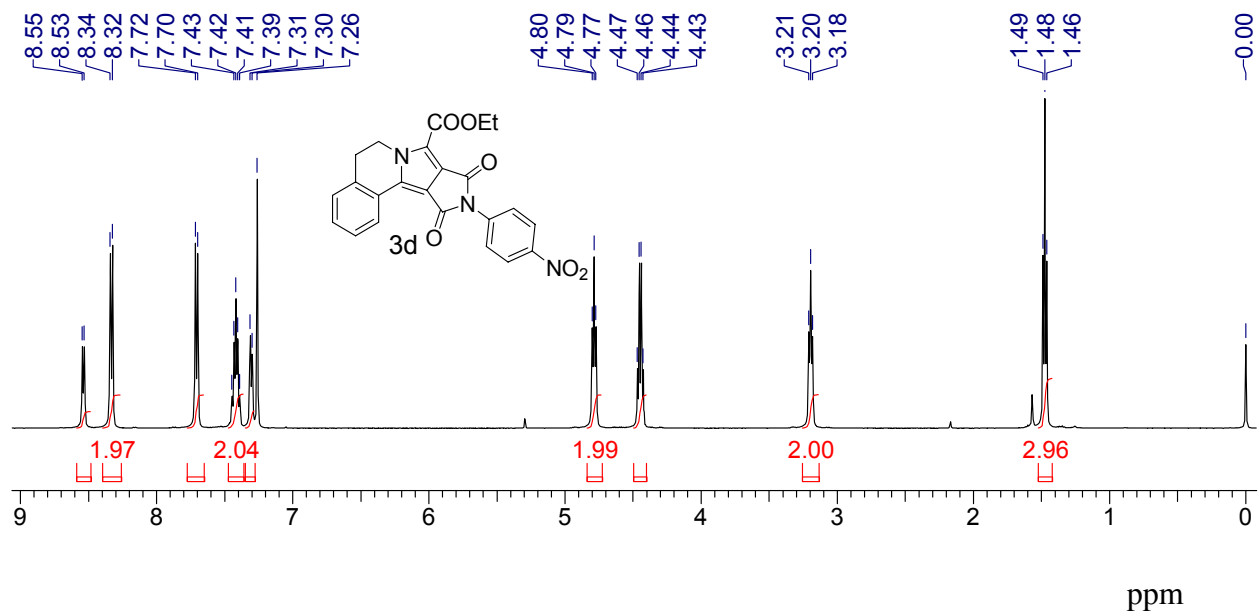

**Fig. S60**  $^1\text{H}$ NMR of **3d**. Reaction conditions: **1** (0.15 mmol, 26 mg), **2d** (0.1 mmol, 21.8 mg), **B-2** (1mmol%) and NBS (1.2 equiv) were mixed in  $\text{CH}_2\text{Cl}_2$  (5.0 mL), the mixture was irradiated 1.5 h.

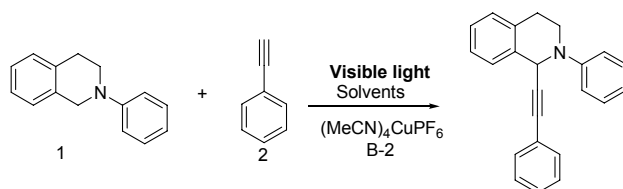

<sup>a</sup> Reaction conditions: **1** (0.10 mmol), **2** (0.8 mmol), photocatalyst catalysis B-2 (1mol%) , air, 35 W Xe light irradiation ( $\lambda > 385 \text{ nm}$ ),  $(\text{MeCN})_4\text{CuPF}_6$  (10 mol%), and solvent (3.0 mL), rt. Yield: 77 %.

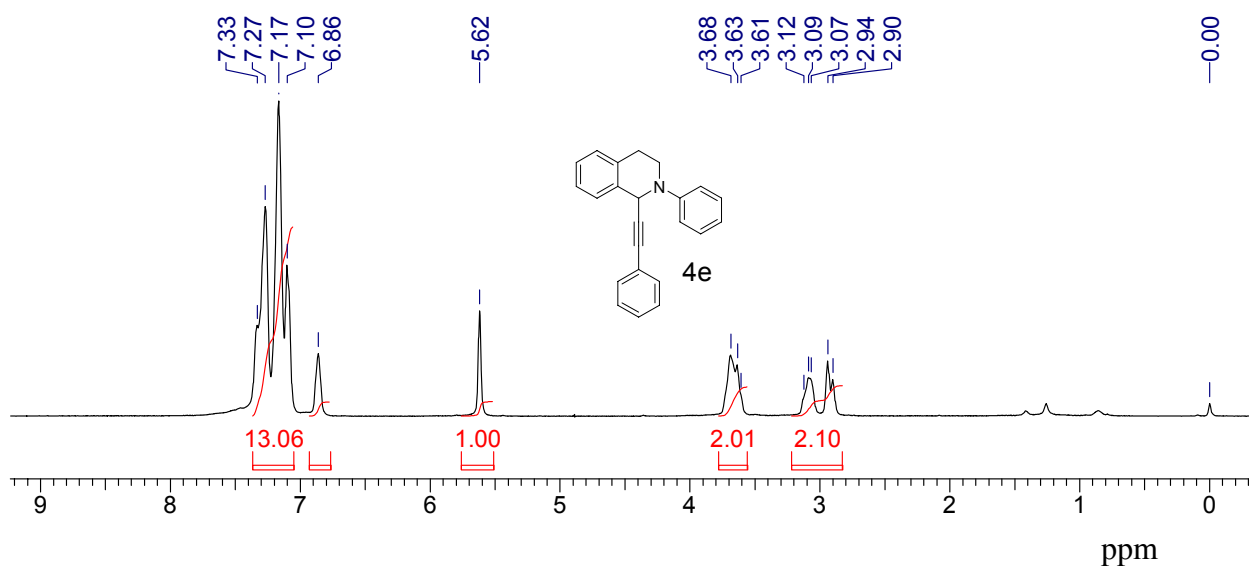

**Fig. S61**  $^1\text{H}$ NMR of **3d**. Reaction conditions: **1** (0.10 mmol), **2** (0.8 mmol), photocatalyst catalysis **B-2** (1 mol%), air, 35 W Xe light irradiation ( $\lambda > 385$  nm),  $(\text{MeCN})_4\text{CuPF}_6$  (10 mol%), and solvent (3.0 mL).

## 10. The Photocatalytic reaction run on a large scale <sup>a</sup>

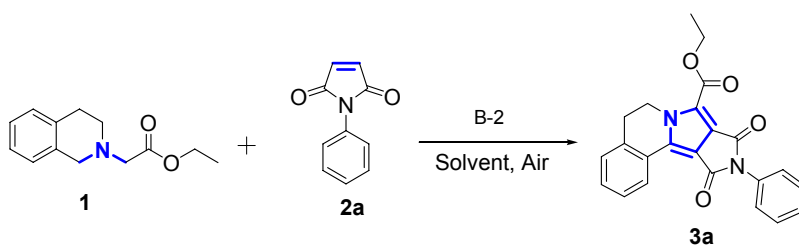

<sup>a</sup> Reaction conditions: **1** (0.45 mmol, 78 mg), **2a** (0.3 mmol, 51.9mg), **B-2** (1mmol%) and NBS (1.2 equiv) were mixed in  $\text{CH}_2\text{Cl}_2$  (7.0 mL), the mixture was irradiated 1.5 h, Yield: 83 %.

## 11. The data of electrochemistry

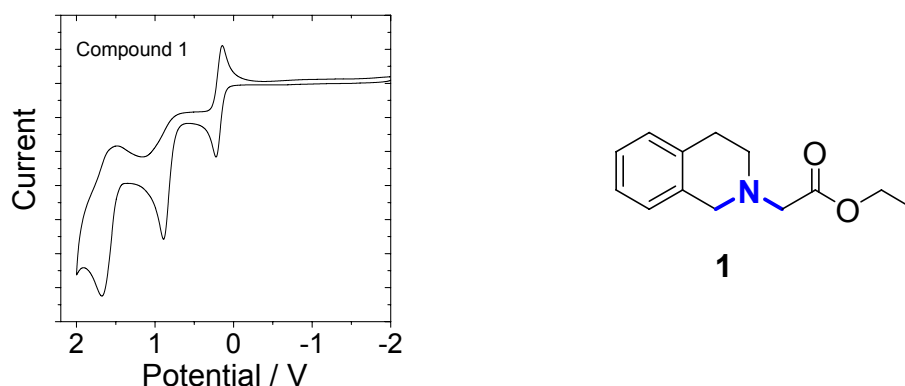

**Fig. S62** Cyclic voltammogram of the dyad photosensitizer compound **1**. Ferrocene (Fc) was used as internal reference ( $E_{1/2} = +0.40$  V (Fc+/Fc) vs. SCE). In deaerated  $\text{CH}_3\text{CN}$  solutions containing 1.0 mM photosensitizers alone, or with the ferrocene, 0.10 M  $\text{Bu}_4\text{NPF}_6$  as supporting electrolyte, Ag/AgNO<sub>3</sub> reference electrode, Scan rates: 0.05 V/s.

### Calculation of the free energy changes of the electron transfer

The free energy changes of the electron transfer process (charge separation, CS), can be calculated with the Weller equation (eq. 1 and eq.2).

$$\Delta G_{\text{CS}}^0 = e[E_{\text{OX}} - E_{\text{RED}}] - E_{00} + \Delta G_{\text{S}} \quad (\text{Eq. 1})$$

$$\Delta G_{\text{S}} = -\frac{e^2}{4\pi\epsilon_{\text{S}}\epsilon_0 R_{\text{CC}}} - \frac{e^2}{8\pi\epsilon_0} \left( \frac{1}{R_{\text{D}}} + \frac{1}{R_{\text{A}}} \right) \left( \frac{1}{\epsilon_{\text{REF}}} - \frac{1}{\epsilon_{\text{S}}} \right) \quad (\text{Eq. 2})$$

Where  $\Delta G_{\text{S}}$  is the static Columbic energy, which is described by eq. 2.  $e$  = electronic charge,  $E_{\text{OX}}$  = half-wave potential for mono-electron oxidation of the electron-donor unit,  $E_{\text{RED}}$  = half-wave



potential for one-electron reduction of the electron-acceptor unit; note herein the anodic and cathodic peak potentials were used because in some cases the oxidation is irreversible therefore the formal potential  $E_{1/2}$  cannot be derived;  $E_{00}$  = energy level approximated with the fluorescence emission wavelength (for the singlet excited state), or 1.20 eV for the  $T_1$  state energy of iodo-Aza Bodipy.  $\epsilon_s$  = static dielectric constant of the solvent,  $R_{CC}$  = (17.0 Å) center-to-center separation distance determined by DFT optimization of the geometry,  $R_D$  is the radius of the BODIPY-based donor,  $R_A$  is the radius of the electron acceptor,  $\epsilon_{REF}$  is the static dielectric constant of the solvent used for the electrochemical studies,  $\epsilon_0$  permittivity of free space. The solvents used in the calculation of free energy of the electron transfer is  $CH_3CN$  ( $\epsilon = 37.5$ ).

Based on these parameters, for **B-2** in  $CH_3CN$ ,  $\Delta G_S$  is calculated as  $-0.02$  eV.

With azaBodipy unit as the electron acceptor and Bodipy part as the electron donor,

Given the electron transfer occurs via the triplet excited state of the azaBodipy,

$$\text{then } \Delta G(CS) = 1.15 - (-0.22) - 1.2 - 0.02 = +0.15 \text{ eV};$$

Given the electron transfer occurs via the singlet excited state of the Bodipy part,

$$\text{then } \Delta G(CS) = 1.15 - (-0.22) - 2.4 - 0.02 = -1.05 \text{ eV};$$

For **1** and iodo-Aza Bodipy

We hypothesis that two molecules should collide each other to carry out electron transfer between the molecules, here  $R_{CC}$  = (10.6 Å) center-to-center separation distance determined by DFT optimization of the geometry.  $\Delta G_S$  is calculated as  $-0.06$  eV. 1.20 eV for the  $T_1$  state energy of iodo-Aza Bodipy. Triplet excited state of iodo-Aza Bodipy also were determined by DFT calculation.

Considering the mixture was irradiated with 35 W Xe lamp ( $\lambda > 385$  nm), **1** was nearly impossible to be excited by Xe lamp. Thus we proposed that electron only could transfer from **1** to triplet excited state of iodo-Aza Bodipy.

With the azaBodipy unit in **B-2** as electron acceptor and  $T_1 = 1.2$  eV,

$$\text{the } \Delta G(CS) = 1.0 - (-0.22) - 1.2 - 0.06 = -0.04 \text{ eV}$$
